# Supplementary material
Source: PubMed Central journal article supplement (PMC6612710)
Supplement: mmc2.pdf [file mmc2.pdf]

# Fast and Accurate Shared Segment Detection and Relatedness Estimation in Un-phased Genetic Data via TRUFFLE

Apostolos Dimitromanolakis,<sup>1,2</sup> Andrew D. Paterson,<sup>3,4,5,\*</sup> and Lei Sun<sup>1,5,\*</sup>

Relationship estimation and segment detection between individuals is an important aspect of disease gene mapping. Existing methods are either tailored for computational efficiency or require phasing to improve accuracy. We developed TRUFFLE, a method that integrates computational techniques and statistical principles for the identification and visualization of identity-by-descent (IBD) segments using un-phased data. By skipping the haplotype phasing step and, instead, relying on a simpler region-based approach, our method is computationally efficient while maintaining inferential accuracy. In addition, an error model corrects for segment break-ups that occur as a consequence of genotyping errors. TRUFFLE can estimate relatedness for 3.1 million pairs from the 1000 Genomes Project data in a few minutes on a typical laptop computer. Consistent with expectation, we identified only three second cousin or closer pairs across different populations, while commonly used methods identified a large number of such pairs. Similarly, within populations, we identified many fewer related pairs. Compared to methods relying on phased data, TRUFFLE has comparable accuracy but is drastically faster and has fewer broken segments. We also identified specific local genomic regions that are commonly shared within populations, suggesting selection. When applied to pedigree data, we observed 99.6% accuracy in detecting 1<sup>st</sup> to 5<sup>th</sup> degree relationships. As genomic datasets become much larger, TRUFFLE can enable disease gene mapping through implicit shared haplotypes by accurate IBD segment detection.

## Introduction

Estimating relatedness and co-ancestry among pairs of individuals is a commonly encountered task in genetic studies. Traditionally, likelihood-based methods (e.g., PREST<sup>1,2</sup>) or method-of-moments estimators (e.g., PLINK<sup>3</sup>) were used in linkage or association studies, respectively. KING<sup>4</sup> introduced a computationally efficient kinship estimation approach (KING-kinship) that does not explicitly require allele frequency estimation and presumably could be more robustly applied to relationship inference in non-homogeneous population samples. The method is widely used for the inference of *close* relationships in large-scale genetic data, although it can have a higher error rate for distantly related pairs,<sup>5</sup> also see [Results](#) below.

The availability of increasing marker densities in studies using genotyping arrays or sequencing technologies makes a different class of methods that perform identical-by-descent (IBD) segment detection more attractive. These methods estimate recent shared ancestry between pairs of individuals by identifying shared chromosomal segments, and they have been implemented in software such as GERMLINE,<sup>6</sup> BEAGLE Refined IBD,<sup>7</sup> and fastIBD.<sup>8,9</sup> However, although these methods can provide more refined estimates of shared ancestry, identify long-distance relationships, and assist disease mapping, they

typically require orders of magnitude more computational time and need accurate phasing of the input data. The resulting application complexities prevent their broader use in large-scale genetic studies.

Methods for IBD segment detection in un-phased data have been proposed, including IBDSeq,<sup>10</sup> Parente2,<sup>11</sup> and the recent shared segment method implemented in the KING software (KING-segment).<sup>12</sup> Among those, IBDSeq and Parente2 are not fast enough for application to large studies and do not provide genome-wide IBD estimation in a single step. The accuracy profile of the KING-segment method has yet to be reported.

We developed TRUFFLE, a practical method that enables faster and yet accurate identification of IBD1 and IBD2 segments shared between individuals, calculation of averaged IBD sharing probabilities across the genome (or kinship coefficients), and visualization of shared segments using un-phased genetic data. By skipping the haplotype phasing step and, instead, relying on a simpler region-based approach, the proposed method is less computationally intensive and much easier to apply. In addition, a built-in error model corrects for segment break-ups that can occur as a consequence of genotyping errors. Finally, an integrated variant filtering allows direct application of TRUFFLE to raw variant calls from VCF files, without the need for external linkage disequilibrium (LD) pruning of markers.

<sup>1</sup>Department of Statistical Sciences, University of Toronto, Toronto, ON M5S 3G3, Canada; <sup>2</sup>Samuel Lunenfeld Research Institute, Mount Sinai Hospital, 60 Murray Street, Toronto, ON MT5 3L9, Canada; <sup>3</sup>Program in Genetics and Genome Biology, The Hospital for Sick Children, Toronto, ON MSG 0A4, Canada; <sup>4</sup>Division of Epidemiology, Dalla Lana School of Public Health, University of Toronto, ON M5T 3M7, Canada; <sup>5</sup>Division of Biostatistics, Dalla Lana School of Public Health, University of Toronto, ON M5T 3M7, Canada

\*Correspondence: [andrew.paterson@sickkids.ca](mailto:andrew.paterson@sickkids.ca) (A.D.P.), [sun@utstat.toronto.edu](mailto:sun@utstat.toronto.edu) (L.S.)  
<https://doi.org/10.1016/j.ajhg.2019.05.007>

© 2019 American Society of Human Genetics.

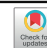

## Material and Methods

Without loss of generality, let us consider a single chromosome on which we identify IBD1 and IBD2 segments for a pair of individuals ( $a, b$ ) based on available, un-phased bi-allelic single-nucleotide polymorphism (SNP) data. As in convention, the markers are arranged by physical position, and the genotypes of individual  $a$  at marker  $j$  are  $G^a(j) = \{0, 1, 2\}$ , where  $a$  ranges from 1 to  $n$  and  $j$  ranges from 1 to  $m$ . For every pair of individuals ( $a, b$ ), we define

$$IBS_2^{a,b}(j) : = 1 \text{ if } G^a(j) = G^b(j), \text{ and } = 0 \text{ otherwise,}$$

$$IBS_{12}^{a,b}(j) : = 1 \text{ if } \text{abs}(G^a(j) - G^b(j)) < 2, \text{ and } = 0 \text{ otherwise.}$$

$IBS_2^{a,b}(j)$  tracks if the genotypes at marker  $j$  are identical between the two individuals, i.e., two alleles shared identity-by-state (IBS), IBS2, while  $IBS_{12}^{a,b}(j)$  tracks IBS at least one. If either of the genotypes at SNP  $j$  is missing, then both values are defined to be 1 to prevent segment break-up and keep the same set of markers for all pairs analyzed. It is assumed that long continuous stretches of missing data do not exist in datasets that underwent standard quality control.

For each marker  $j$  on the chromosome, we also define  $p.IBS2(j)$  and  $p.IBS12(j)$  to be the expected probability of having, respectively, two alleles and at least one allele shared IBS between a pair of unrelated individuals. These probabilities depend on the minor allele frequency (MAF) of the bi-allelic marker,  $maf_j$ , such that  $p.IBS2(j) = (maf_j)^4 + (1 - maf_j)^4 + (2maf_j(1 - maf_j))^2$  and  $p.IBS12(j) = 1 - 2(maf_j)^2(1 - maf_j)^2$ . We can then define  $p_2$  and  $p_{12}$ , respectively, as the averaged  $p.IBS2(j)$  and  $p.IBS12(j)$  across all markers. The values of  $p_2$  and  $p_{12}$  would in turn depend on the distribution of the MAFs for the panel of bi-allelic markers used. However, we note that the method is generally robust to mis-specification of MAFs (see Results).

### Base Model with No Genotype Error Consideration

As a basic model we consider scanning a pair of individuals for long stretches of IBS2 or IBS12. A stretch of multiple consecutive IBS markers are likely to be IBD if (1) it is unlikely to occur by chance and (2) it extends beyond the LD of the region that is being considered.

For criterion 1, in a typical whole-genome dataset (either by genotyping or sequencing, e.g., the 1000 Genomes Project<sup>13</sup>) and considering only common variants (MAF > 5%, defined globally), the average  $p.IBS2(j)$  over approximately 1,000 markers from a randomly selected region ranges from 0.46 to 0.51, with a mean of  $p_2 = 0.48$  over the whole genome (Supplemental Data – Section 2). A consecutive stretch of  $k$  independent markers that are all IBS2 has a probability of occurring by chance of approximately  $0.48^k$ . Thus, when ignoring LD between markers, we could set a length threshold  $l_2$  for declaring IBD2 segments, such that  $p_2^{l_2} < 10^{-8}$ . The detection of IBD1 segments through long stretches of IBS sharing is harder, as the probability of at least one allele shared IBS (i.e., IBS12) by chance is substantially higher than IBS2 alone. For example, the average  $p.IBS12(j)$  in a randomly selected region ranges from 0.92 to 0.94, with a mean of  $p_{12} = 0.93$  (Supplemental Data – Section 2). To establish a low probability of a false positive for IBD1, as before, we set the minimum length  $l_1$  (typically substantially greater than  $l_2$ ) such that  $p_{12}^{l_1} < 10^{-8}$  for independent markers.

For criterion 2, ideally, using a model that takes into account local LD structure can guide the selection of the minimum

segment length required for a particular region. However, LD-based hidden Markov models (HMMs) pose a serious computational burden and are typically thousands of times slower than non-LD models.<sup>5</sup> The need for an accurate and high-resolution genetic map also limits their applicability to individuals of mostly European descent. To reduce the effects of LD without incurring a significant computational time penalty, we consider a basic pruning approach such that markers closer than a specific number of base pairs are removed. We performed sensitivity analysis of the minimum length parameters,  $l_1$  and  $l_2$ , to identify the cutoff values for robust estimation of overall IBD1 and IBD2 sharing (Supplemental Data – Section 3). As a default, segments shorter than 5 Mb for IBD1 or 2 Mb for IBD2 are not considered, although these cutoffs can be adapted using command line options. Filtering of segments by genetic distance in centiMorgan (cM) can also be done, with a set of post-processing scripts. For our analyses here, we have used the genetic map on build GRCh37 as provided in the BEAGLE<sup>8</sup> website (see Web Resources). Although these default parameter values can be revised by the user, we have found that in practice (see Results below), they work well for datasets with a variety of ancestral compositions, variant densities, and sequencing or array-based platforms.

### Model with Genotyping Error

A common problem in segment detection is the presence of genotyping error, which breaks apart segments and can easily cause false negatives in segment detection. In addition, *de novo* mutation events can generate spurious errors that will further increase the rate of segment break-ups. For example, with an error rate of 0.5%, two individuals on average will have at least 25 markers with genotyping error in a segment of 5,000 markers. Previous analysis showed that methods accounting for genotyping error like IBDseq have better performance than methods that do not, like Refined IBD<sup>7</sup> (Figure 2 of Browning and Browning<sup>10</sup>). The error model implemented in TRUFFLE was developed to cope with error rates up to 1%, which might be the case in low-depth sequencing data. In its essence, the proposed approach is a finite deterministic state space model with an unbounded number of states (Figure 1).

For the case of identifying IBD1 segments for a pair of individuals ( $a, b$ ), the genome is scanned sequentially from marker 1 to  $m$ . A set of four states is kept at each marker position:  $S_j = \{s_1, s_2, s_3, e\}$ ,  $j = 1, \dots, m$ , with the initial values being  $S_0 = \{0, 0, 0, 0\}$ . Intuitively, these four states correspond to the lengths of the last three IBS1 segments ( $s_1, s_2, s_3$ ) that were found and an error load ( $e$ ) of the currently considered segment. A description of the algorithm for identifying IBD1 segments is shown in Figure 1. The algorithm for IBD2 segment detection is identical, but with different values for the five tuning parameters:  $A, B, r_0, r_1$ , and  $r_2$ .

The parameter setting of  $A = 1, B = 0$ , and  $r_0, r_1, r_2 = \infty$  corresponds to a no genotyping error model. In contrast, given a non-zero  $B$ , approximately  $B/A$  errors are allowed for a shared segment before it is considered broken, while short segments are joined together if at least one of them is long enough. In practice, this model is computationally efficient as no complex mathematical operations are required.

The default values for parameters  $A, B, r_0, r_1$ , and  $r_2$  are different for detecting IBD1 and IBD2, and they were optimized by simulations. Briefly, for IBD1 we simulated regions containing 20,000 independent variants, with an average probability of IBS12 of 0.93 to 0.95 (representative of typical genotyping datasets, for example

```

function computeSharedLengthIBD1:
  Lshared ← 0
  {s1, s2, s3, e} ← {0, 0, 0, 0}
  for j in 1 to m
    s3 ← s3 + 1
    if IBS12a,b(j) = 1 then
      e ← max{e - 1, 0}
    else
      e ← e + A
    end if
    if e + A > B then
      length ← s3
      if s1 > r0 or s2 > r0 then length ← s3 + s2 + s1; end if
      if s1 > r1 or s2 > r2 then s1 ← s1 + s2 else s1 ← s2; end if
      if length > l1 then Lshared ← Lshared + length; end if
      s2 ← s3
      e ← 0
    end if
  end for
  return Lshared

```

**Figure 1. The TRUFFLE Algorithm for IBD1 Detection with Error Model**

For IBD2, replace  $IBS_{12}^{a,b}(j)$  with  $IBS_2^{a,b}(j)$ .

see Figure S1). Artificial IBD shared segments of 500 markers were added by copying one or two haplotypes of the region from one individual to another; this segment size corresponds to a proportion of IBD1 of 0.125% in a 400k-marker panel. An exhaustive search for the best parameter values was then performed, selecting the ones that maximized the detection power at a false positive error rate of 0.001. For the case of IBD2, similar datasets were simulated, with the markers having an average probability of IBS2 of 0.5, and artificial IBD2 segments of sizes 1 to 5 Mb were added.

### Segment Visualization

A significant benefit of IBD segment detections algorithms is that they can provide the locations of IBD1 and IBD2 segments, across the genome. TRUFFLE aids the visualization of such segments by including a set of scripts to create interactive images showing the chromosomes and shared segments; see Results below.

### Implementation

TRUFFLE was implemented in C++. It is readily applicable to genome-wide datasets with high marker densities, even on typical laptop computers. Support for parallel execution in multi-core computers and variant filtering (e.g., MAF, missing rate, and minimal distance between markers in base pairs) is integrated. The input file is a multi-sample VCF file generated ideally from joint calling across samples<sup>14</sup> and contains all or some autosomes. The input file can be phased, although it is not treated differently. If necessary, users can define parameter values for the minimum segment detection length and the reporting threshold for related pairs. TRUFFLE is available free for non-commercial use (see Web Resources).

## Results

### Power Study

To better understand the statistical properties of TRUFFLE to identify shared segments across distant relatives, we pursued simulations using simuPOP v.1.1.3,<sup>15</sup> following the

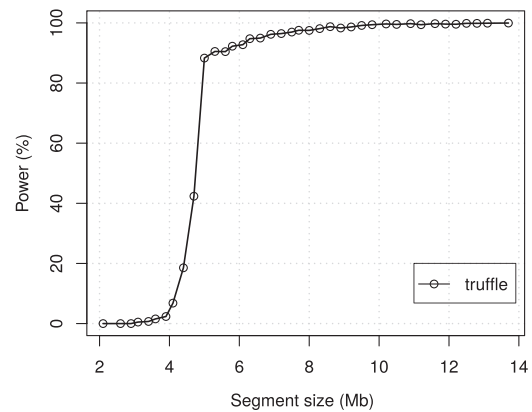

**Figure 2. Power of IBD1 Segment Detection ( $\alpha = 4.6 \cdot 10^{-4}$ ) by TRUFFLE Stratified by Segment Size**

True shared segments (IBD1) of varying sizes were inserted in simulated variant data (38,174 markers) using simuPOP and the simuGWAS scripts.

simulation design of Peng and Amos;<sup>16</sup> the exact simulation scripts are provided in the [Supplemental Material and Methods](#).

A single chromosome was simulated, with 38,174 bi-allelic markers having  $MAF > 5\%$ . The simulation used the HapMap phase III populations TSI and LWK as the initial population composition,<sup>3</sup> simulating a heterogeneous dataset of 3,000 individuals with equal numbers from the two populations. Artificial IBD1 segments of varying sizes were then injected into pairs of individuals within each population.

Under the null condition, we set the false positive rate to be  $4.6 \times 10^{-4}$ ; note that this error rate depends on the parameter values used in the simulation. Although this rate appears to be small, it allows for 2,070 false positives for the 3,000 individuals analyzed because there were about  $4.5 \times 10^6$  pairs in total.

For each dataset simulated under the alternative, 100 individuals were randomly selected and 100 artificial IBD1 segments, of lengths ranging from 2 to 14 Mb, were created by copying these 100 segments into another 100 randomly selected individuals. In addition, genotype errors based on an error rate of 0.9% were added to the shared segments. In total, 15,000 datasets were simulated. While TRUFFLE accurately detects large segments (power  $> 80\%$  for segments  $> 5$  Mb), it has lower power ( $< 5\%$ ) for segments  $< 4$  Mb (Figure 2).

### 1000 Genomes Project Data

We applied TRUFFLE to the 20130502 release of the 1000 Genomes phase III data.<sup>13</sup> The dataset consists of variant calls for 2,504 individuals from 26 populations (five super-populations: 661 Africans, 347 admixed Americans, 504 East Asians, 489 South Asians, and 503 Europeans). The total number of variants is approximately 88 M before any filtering is applied. These variants were derived from a combination of low- and high-coverage whole-genome sequencing data, high-coverage exome sequence, and

**Table 1. Comparison of Relationship Estimation in 2,504 Individuals from the 1000 Genomes**

| Relationship                             | Cutoff <sup>1</sup> | Dataset (A) |              |              | Dataset (B) |              |              | Dataset (C)  |
|------------------------------------------|---------------------|-------------|--------------|--------------|-------------|--------------|--------------|--------------|
|                                          |                     | TRUFFLE     | KING Kinship | KING Segment | TRUFFLE     | KING Kinship | KING Segment | KING Segment |
| <b>All Pairs</b>                         |                     |             |              |              |             |              |              |              |
| Full sibling or parent-offspring         | 0.1875              | 12          | 12           | 12           | 12          | 12           | 12           | 12           |
| First cousin or closer                   | 0.035               | 61          | 14,201       | 59           | 61          | 90           | 1,726        | 81           |
| Second cousin or closer                  | 0.0097              | 200         | 573,326      | 214          | 229         | 34,927       | 28,012       | 2,036        |
| Third cousin or closer                   | 0.0024              | 1,543       | 684,657      | 1,976        | 2,815       | 172,800      | 35,799       | 8,180        |
| <b>Pairs Observed across Populations</b> |                     |             |              |              |             |              |              |              |
| Full sibling or parent-offspring         | 0.1875              | 1           | 1            | 1            | 1           | 1            | 1            | 1            |
| First cousin or closer                   | 0.035               | 2           | 6,524        | 2            | 2           | 8            | 211          | 2            |
| Second cousin or closer                  | 0.0097              | 2           | 467,149      | 2            | 3           | 16,746       | 14,079       | 21           |
| Third cousin or closer                   | 0.0024              | 25          | 573,081      | 30           | 244         | 110,274      | 18,704       | 251          |

Top: Kinship estimation using TRUFFLE v.1.38 and KING v.2.1.6 for the two datasets (A) and (B) generated from the 1000 Genomes Project phase 3 data.<sup>13</sup> The numbers of pairs that fall under four different kinship cutoffs are shown. Bottom: The corresponding numbers of pairs where the two individuals belong to two different populations are also shown. Large numbers of such pairs are more likely to be false positives.<sup>1</sup> Cutoff chosen as the midpoint between the kinship of the relationship in consideration and the kinship of the next more distant relationship considered in this table. Pairs counted have the estimated kinship greater than the specified cutoff for each row. KING results for dataset (C) (~12M SNPs with MAF > 1%) are provided for comparison since this is recommended for KING.

genome-wide association study (GWAS) array data from two platforms.<sup>13</sup>

For our analyses and method evaluations, three subsets of the bi-allelic markers were generated. The first dataset (A) mirrors what is typically used for relatedness estimation by selecting bi-allelic markers with global MAF > 10% across all populations, and performing LD pruning using PLINK v.1.90b3.44;<sup>3</sup> the indep-pairwise procedure with parameter values 2,000, 200, and 0.1 for the number of markers in window, shift, and  $r^2$  criteria. A total of 63,126 markers remained in dataset (A). The second dataset (B) was derived by selecting markers with MAF > 5% and with a spacing of at least 5 kb between two consecutive markers, resulting in 469,470 markers remaining. Dataset (B) was generated to evaluate the performance of TRUFFLE when the computationally expensive step of LD-pruning is avoided. Unlike dataset (A), dataset (B) can be internally generated by TRUFFLE in a single step from a multi-sample VCF file, streamlining the cryptic relatedness analysis for whole-genome sequencing studies. In addition, due to the higher marker density dataset (B) allows for detection of shorter shared segments. Finally, dataset (C) included all ~12 M biallelic SNPs with MAF > 1%. Variants with missingness > 2% were excluded for all 3 datasets.

For comparison, datasets (A) and (B) were analyzed using the two different approaches implemented in KING v.2.1.6, i.e., KING-kinship<sup>4</sup> and the more recent KING-segment.

Despite more than 3 M pairs of individuals to be examined, the running time of TRUFFLE was 1.6 min, using 8 cores of a 2 Ghz Xeon CPU processor for dataset (A). The running time of the KING-segment procedure was only 9.7 s but came at the cost of robustness; see below. TRUFFLE running time for dataset (B) was 9.7 min because

of the increased number of markers; however, it does not require the LD-pruning step that involved 115 min of computing time using the indep-pairwise procedure in PLINK. KING time for dataset (B) was 40 s.

For relationship estimation, KING identified a significant number of distant relationship pairs and appeared to be quite sensitive to the density of markers, in contrast with TRUFFLE (Table 1, Figures S5 and S6). With a kinship coefficient cutoff of >0.0097 for declaring second cousin or closer relatedness, the KING-kinship method reported 573,326 pairs while the KING-segment method reported 214 pairs using the low-density LD-pruned marker dataset (A). When using the higher-density bp-pruned dataset (B), KING-segment also reported an unusually high number of 28,012 s cousin or closer related pairs, among which 14,079 pairs are across populations (Table 1). In contrast, TRUFFLE estimated 200 pairs with kinship coefficient equal or greater to second cousin using (A) and 229 using (B), among which 189 pairs are overlapping and only two and three pairs are across populations.

For first-degree relative pairs, results of all three methods (KING-kinship or segment, and TRUFFLE) agree: there were four full-sib pairs and eight parent-offspring pairs reported (Table 1). Looking closer, the estimated IBD2 sharing by the KING-segment method are 18.3%, 12.3%, 14.8%, and 17.3%, respectively, for the identified four full-sib pairs using dataset (A), with a mean of 15.7%. This is noticeably different from the mean value of 25.1% using dataset (B) also based on KING-segment. In contrast, the mean values based on TRUFFLE are 25.6% and 25.9% using datasets (A) and (B), respectively.

We also analyzed dataset (C) using KING, as recommended by KING. The results are indeed improved compared to

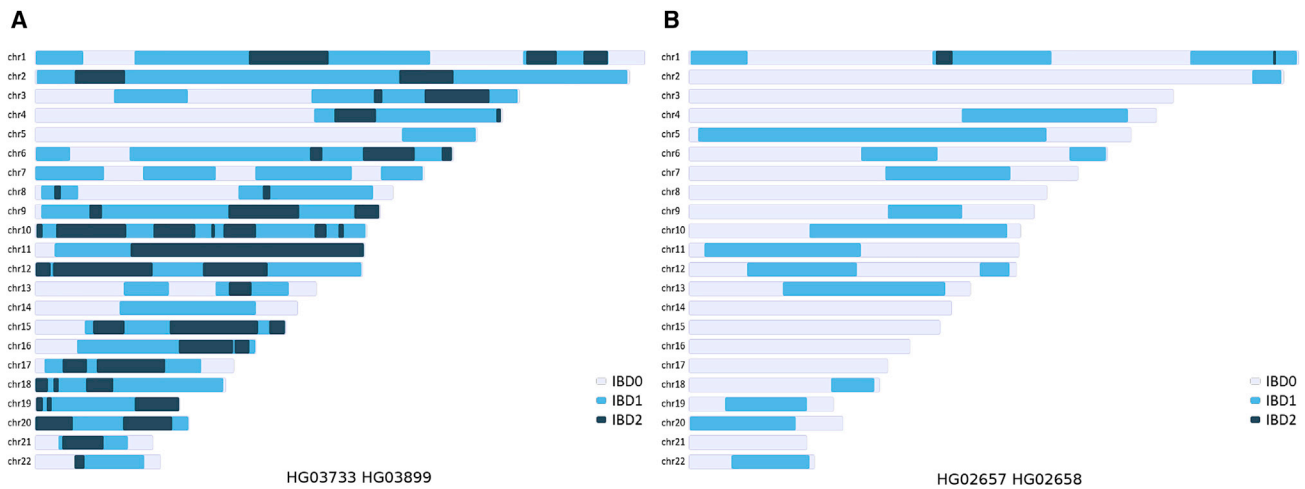

**Figure 3. Locations of Shared Segments Identified by TRUFFLE in Two Pairs from the 1000 Genomes Data**

(A) A putatively full-sib pair from the STU population showing numerous *IBD1* and *IBD2* shared segments.

(B) A putatively more distant related pair from the PJJ population with estimated *IBD1* of 32% and *IBD2* of 0.48% across the genome.

using dataset (B) for KING (see Table 1). However, using this many markers negates any computational advantage of KING over TRUFFLE as now the running time for KING was 29 min, about 3 times slower than TRUFFLE. Nevertheless, both KING and TRUFFLE are much faster than phased methods. For example, an earlier numerical experiment showed that BEAGLE Refined IBD and GERMLINE required 64 CPU days for phasing a dataset with ~2,500 individuals and ~500,000 SNPs, compared to 5 min when using an earlier, slower KING method<sup>5</sup>

Our primary analyses used MAFs estimated from all available individuals, which are simple to implement when analyzing cross-population pairs. To study the effect of using globally defined MAFs on the TRUFFLE analyses for individual populations, we re-analyzed dataset (B) (~470,000 SNPs with global MAF > 5%). We re-screened the SNPs requiring the MAF > 5% in the CEU sample alone (~430,000 SNPs), then performed the TRUFFLE analysis again in CEU. IBD segment estimates are very similar between the two analyses (correlation > 0.99). This is true for another population, the LWK African sample, analyzed in a similar way. In addition, the location of shared segments generally were not sensitive to the number of markers and did not vary when either global or population-specific MAFs were used (Figure S12).

Visualization of the exact locations of detected IBD segments can be generated using TRUFFLE post-processing scripts. Figure 3 illustrates segment locations for two selected related pairs from the 1000 Genomes Project, obtained in dataset (B).

### Short Shared Segment Analysis

Genomic sharing among unrelated individuals is common and has been described previously. For example, analyses of HapMap II data revealed patterns of segment sharing among seemingly unrelated individuals.<sup>17</sup> It was estimated that, on average, any two individuals from

the same population share approximately 0.5% of their genome through recent IBD, and 10% to 30% of the pairs share at least one region of their genome IBD.

We performed a scan of all the 2,504 individuals from the 1000 Genomes Project for *IBD1* and *IBD2* segments using TRUFFLE and dataset (B). To this end, a minimum length of 1,000 markers was used as a cutoff to detect both *IBD1* and *IBD2* segments; this is different from the earlier default recommendations of 5 Mb for *IBD1* and 2 Mb for *IBD2*. To understand the characteristics of locally shared IBD segments between apparently unrelated individuals, we removed segments shared between 574 pairs that are closely related (estimated average *IBD1*+*IBD2* > 0.02). Among the remaining pairs, the minimum segment length detected was 5.45 Mb for *IBD1* and 5.54 Mb for *IBD2*, and the maximum lengths were, respectively, 68.0 Mb (pair HG00641-HG01162 within the PUR population) for *IBD1* and 11.9 Mb (pair HG02348-HG01967 within the PEL population, Peruvians from Lima, Peru). In total, there were 956,577 *IBD1* segments and 575 *IBD2* segments.

Greater than 30% of the pairs in the Puerto Ricans from Puerto Rico population (PUR) share at least 0.5% of their genomes *IBD1* (Figure 4A) and 62% of pairs share at least one segment of length >10 cM (Figure S9). The sharing is even more extensive for segments >5 cM, where more than 82% of pairs share at least one segment. These findings align with previous analyses using Refined IBD of BEAGLE;<sup>7</sup> for example, Auton et al.<sup>13</sup> showed that Puerto Ricans have one of the lowest effective population sizes. The average sharing length in the PUR population was 28.5 cM among all pairs; for comparison, the average length in CEU, GBR, and TSI was 2.37, 4.28, and 3.62 cM, respectively.

The Finnish in Finland sample (FIN) also showed extensive segment sharing (average length 16.1 cM), to an extent higher than the other three European populations (CEU, TSI, and GBR). More than 18% of the pairs in the

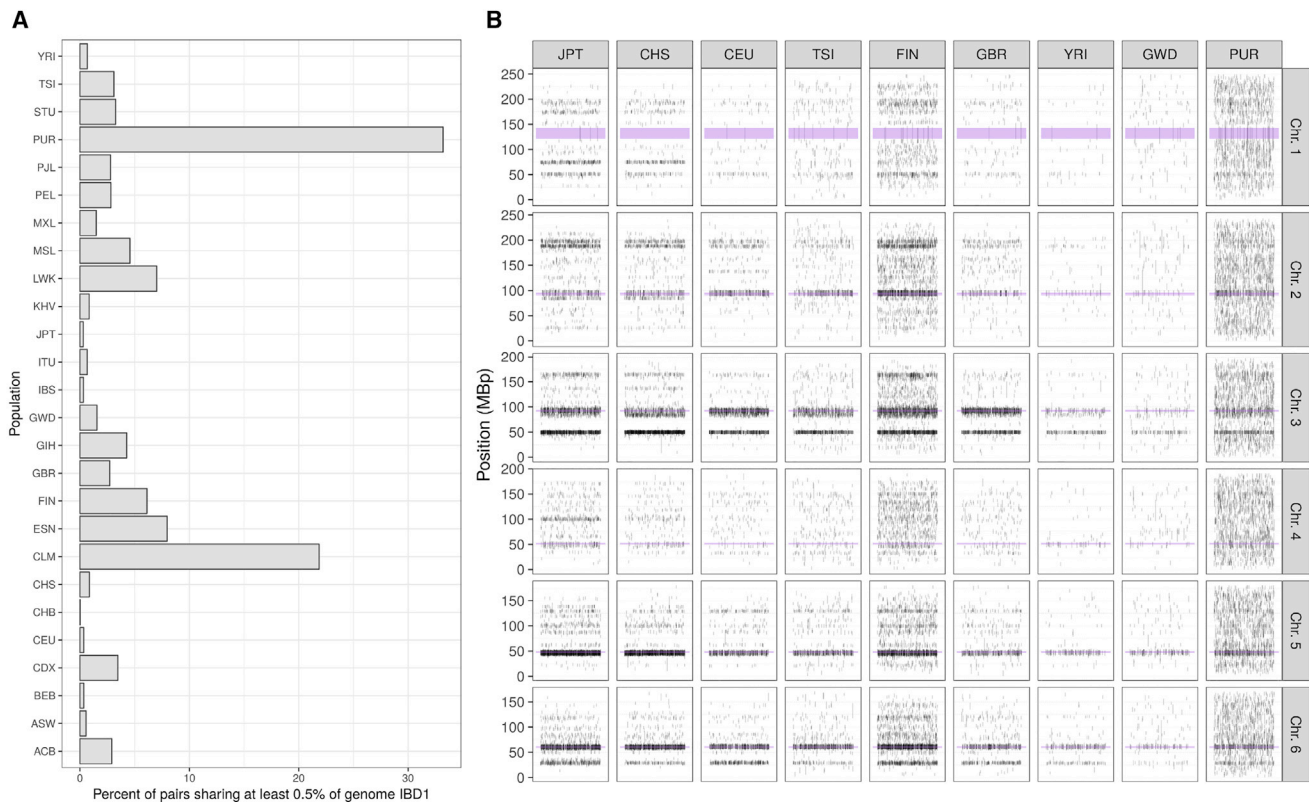

**Figure 4. Shared Segments among the 1000 Genomes Populations**

(A) Proportion of pairs within a population that share at least 0.5% of their genome as IBD1.

(B) Distribution of segment locations identified within pairs of the same population for the first six chromosomes and nine selected populations. The segments are positioned randomly on the x axis to aid visualization and reduce over-plotting. The centromere location is denoted with a purple segment.

FIN population share a segment of length  $>10$  cM, in contrast to 0.7% for CEU.

Distribution of segments in Figure 4B (and Figure S10) also suggests sharing hotspots across the genome, likely due to reduced recombination rates in those locations. Similar to our analyses, other approaches have found and reported such hotspots.<sup>18,19</sup> A high proportion of the identified segments fall in specific genomic regions across multiple different populations (e.g., CEU and CHS in Figure 4); see Figure S8 for all 26 populations. Some of the hotspot regions match centromeres of specific chromosomes, indicative of reduced recombination rates at those regions but perhaps also low SNP density. These patterns are less pronounced in African populations (e.g., GWD and YRI), possibly reflecting their higher genetic diversity.<sup>20</sup> Such IBD hotspots shared across populations could inflate relationship estimation and exclusion of hotspots could alter the interpretation of distant relationship estimation.

### Comparison with Genotyping Array Data

To assess the applicability of TRUFFLE to genotyping array data, we used individuals genotyped on the Illumina Omni2.5 array as part of the 1000 Genomes Project.<sup>13</sup> Quality control has been previously performed,<sup>21</sup> and the post-quality control data were downloaded from the

TCAG website, consisting of 2,318 individuals and 1,989,184 SNPs.

To mirror the dataset (B) generated from the 1000 Genomes combined sequencing and array data, we applied TRUFFLE to 322,849 bi-allelic markers with MAF  $> 5\%$  and having minimum distance of 5 kb between markers. Among the 2,318 individuals in the array dataset, 1,693 were common with those in dataset (B). Thus, we compared the kinship estimates for all the pairs involving those 1,693 individuals.

The correlation of TRUFFLE kinship estimates, using array or combined sequencing and array data, was very high with a sample correlation of 0.998 for pairs estimated as having kinship coefficient  $> 0.01$  in either of the two datasets. Essentially, the inference of relatives closer than third cousin is identical between array and sequencing data. Among all pairs, the sample correlation was 0.932 (Supplemental Data and Figure S8), with a mean difference in kinship estimates of  $2.9 \times 10^{-4}$  (standard error of  $8.2 \times 10^{-4}$ ).

### Comparison of Total Lengths of Shared Segments from TRUFFLE and KING with Previously Published BEAGLE Refined IBD Results in the 1000 Genomes

The Refined IBD procedure in BEAGLE<sup>7</sup> is a hidden HMM approach for detecting IBD segments that accounts for

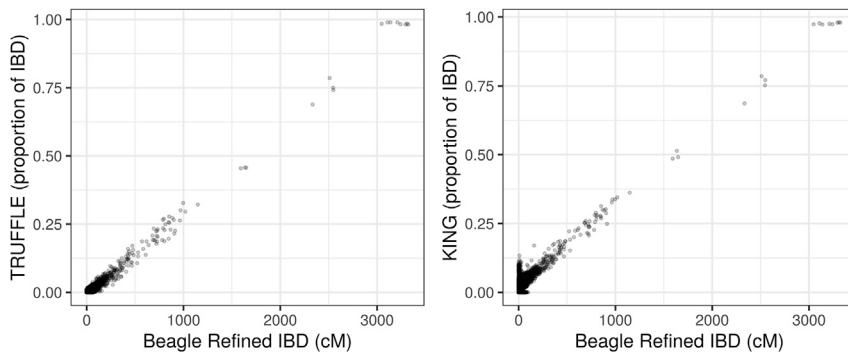

**Figure 5. Comparison of Total Shared Segment Lengths Identified in the 1000 Genomes by TRUFFLE and KING to BEAGLE Refined IBD**

The left figure for TRUFFLE versus BEAGLE using dataset (B), and the right figure for KING-segment versus BEAGLE using dataset (C) as recommended by KING. BEAGLE results were downloaded from the 1000 Genomes project ftp site. Because BEAGLE did not distinguish between IBD1 and IBD2, the y axis shows the estimated  $p.IBD1+p.IBD2$  by TRUFFLE or KING for comparison. We did not convert the cM segment sizes to Mb for BEAGLE in the x axis, as it would require population-specific genetic maps.

LD structure in phased genotype data. Previously, shared segment analysis using BEAGLE v.4.1 was conducted for the 1000 Genomes phase III data and reported by the 1000 Genomes Project.<sup>13</sup> In their analysis, bi-allelic SNPs with more than ten copies of the minor allele were used and results were post-processed to delete small gaps between segments (as Refined IBD does not directly account for genotyping error). We compared the reported results with those of TRUFFLE, as well as with the estimates from the KING-segment method applied to the dataset (A) or (B) as previously. The BEAGLE Refined IBD shared segment results were obtained from the 1000 Genomes project ftp site (see [Web Resources](#)). Because the reported segments in BEAGLE did not distinguish between IBD1 and IBD2, we compared the total length of all IBD segments in each individual pair, which is proportional to the estimated  $p.IBD1+p.IBD2$ .

The agreement between the Refined BEAGLE IBD segment estimation and TRUFFLE is very high with a sample correlation of 0.956 for dataset (A) ([Figure S7](#)) and 0.966 for dataset (B) ([Figure 5](#)). In contrast, the correlation of BEAGLE with KING-segment was 0.971 for dataset (A) ([Figure S7](#)) and 0.355 for (B), consistent with the over-estimation of distant relatedness for dataset (B) as seen in [Table 1](#). Using dataset (C), the correlation between KING and BEAGLE results was 0.88 ([Figure 5](#)). Essentially, TRUFFLE is a compromise between statistical and computational efficiency. KING is faster, but using the results inferred from BEAGLE Refined IBD procedure as benchmarks, TRUFFLE provides a better approximation of the shared segment lengths than KING. BEAGLE is more accurate but TRUFFLE does not need haplotype phasing that is computationally costly, or a detailed genetic map that may not be available for a population of interest.

#### Comparison of Locations of Shared Segments from TRUFFLE with BEAGLE Refined IBD, GERMLINE, and KING in the 1000 Genomes

To compare the specific locations of shared segments between pairs of individuals, we focused on chromosome 1 data from both dataset (B) (32,926 SNPs) and dataset (C) (943,790 SNPs) and compared four methods, including

two (Refined IBD<sup>7</sup> and GERMLINE<sup>6</sup>) that require phased input. Here we used the previously phased data from the 1000 Genomes analysis group using both BEAGLE and SHAPEIT2. Specifically, we ran GERMLINE ([Web Resources](#)) using the options: `-bits 32 -haploid -min_m 3 -err_hom 4 -err_het 1`. (We also ran GERMLINE using the default option of `-bits 128`, but there were excessive segment breakups for the parent-offspring pairs.) We also ran BEAGLE Refined IBD segment detection method using the default options, with the genetic map provided with BEAGLE ([Web Resources](#)); KING<sup>4</sup> v.2.1.6 using the `-ibdseg` method for inferring segment locations; and TRUFFLE v.1.38 using the default options. For Refined IBD we present the results both before and after merging segments using the `merge-ibd-segments.26Feb19.29e.jar` program with the recommended options ([Web Resources](#)).

In the absence of *de novo* mutations, either from single variants or large indels or CNVs, we expect parent-offspring pairs to have IBD1 across the autosomes: this represents a reasonable gold standard. Therefore [Figure 6](#) shows results for all eight parent-offspring pairs. We have also selected a random pair from other more distant relationships for comparisons of lengths and positions of identified IBD segments ([Figure S11](#)).

We conclude that TRUFFLE generally identifies segments of expected lengths (i.e., whole chromosome for parent-offspring pairs), does not have segments broken up, and is relatively robust to the selection of markers in comparison to most of the other methods. In contrast, the two methods that require phased data, BEAGLE Refined IBD and GERMLINE, show many short segments. Note, most methods do not identify IBD at the centromere of chromosome 1 due to low marker density across this large region (>20 Mb).

Consistent with expectations, using 943k chromosome 1 SNPs with MAF > 1% typically produces more segment breaks, likely due to the fact that the genotyping error rate of some of these variants is higher than the 33k SNPs which all have MAF > 5%.<sup>22</sup> Similar results are observed for other types of relative pairs, including randomly selected full-sibs and first cousins, along with more distantly related pairs ([Figure S11](#)).

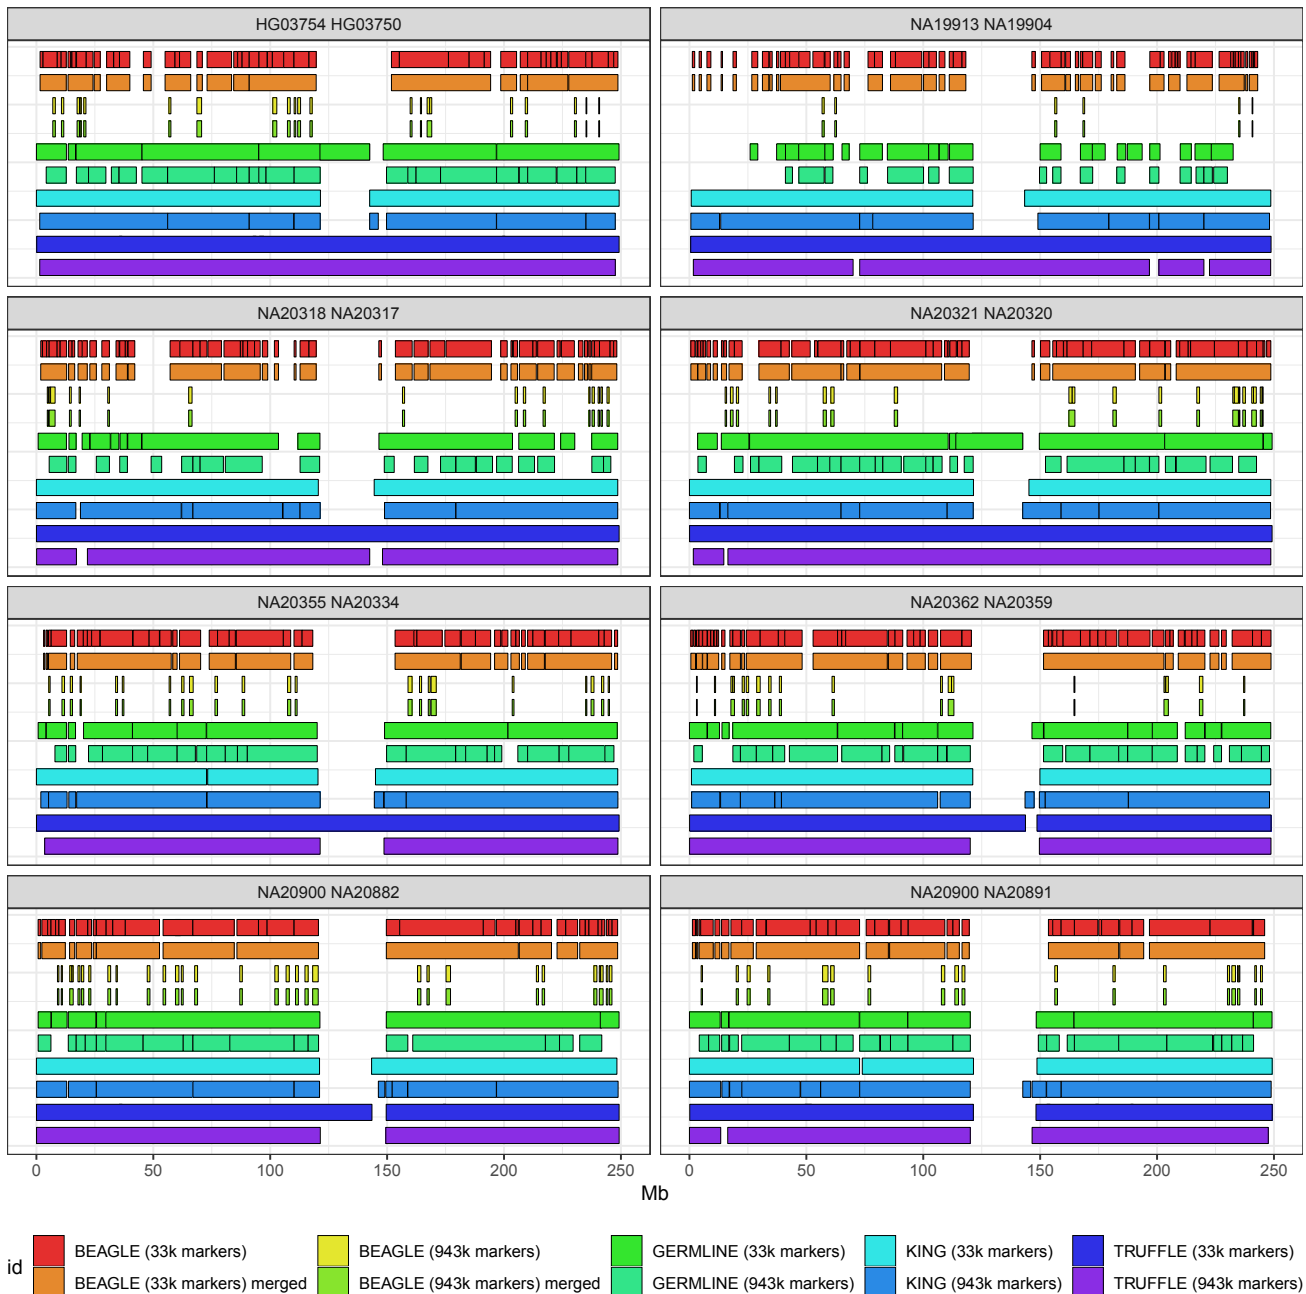

**Figure 6. Comparison of Locations of IBD Segments on Chromosome 1 from the 1000 Genomes Project for Eight Parent-Offspring Pairs using Different Methods and Variant Densities**

The data are from phase 3 release 5. KING and TRUFFLE can work on un-phased data, and BEAGLE Refined IBD and GERMLINE were applied to the data previously phased by the 1000 Genomes analysis group using both BEAGLE and Shapeit2. In the absence of *de novo* mutations, we expect parent-offspring pairs to have IBD1 across the autosomes, representing a gold standard. The 33k SNPs have MAF >5% with >5 kb between two consecutive SNPs with missing rate <2%, and the 943k SNPs have MAF >1% and missing rate <2%. Positions are based on build 37, where the centromere is located at 121.5–142.5 Mb.

### Estimation of Accuracy in Pedigree Data

We analyzed Affymetrix 6.0 array data from 822 genotyped individuals from 173 pedigrees. The data were part of the Genetic Analysis Workshop 20 (GAW20) project and provided by the Genetics of Lipid Lowering Drugs and Diet Network (GOLDN) study.<sup>23,24</sup> The GOLDN study recruited European American pedigrees with at least two siblings from the communities of Minneapolis, MN, and

Salt Lake City, UT. The average pedigree size was 17.8 individuals, with an average of 4.75 genotyped individuals per pedigree. The numbers of reported relationship pairs within the pedigrees are shown in Table S1. Individuals from different pedigrees are presumed to be unrelated.

As part of the GAW20 data release, 718,542 autosomal biallelic SNPs were available for analysis. We applied TRUFFLE to a reduced variant set of 210,181 markers, selected as



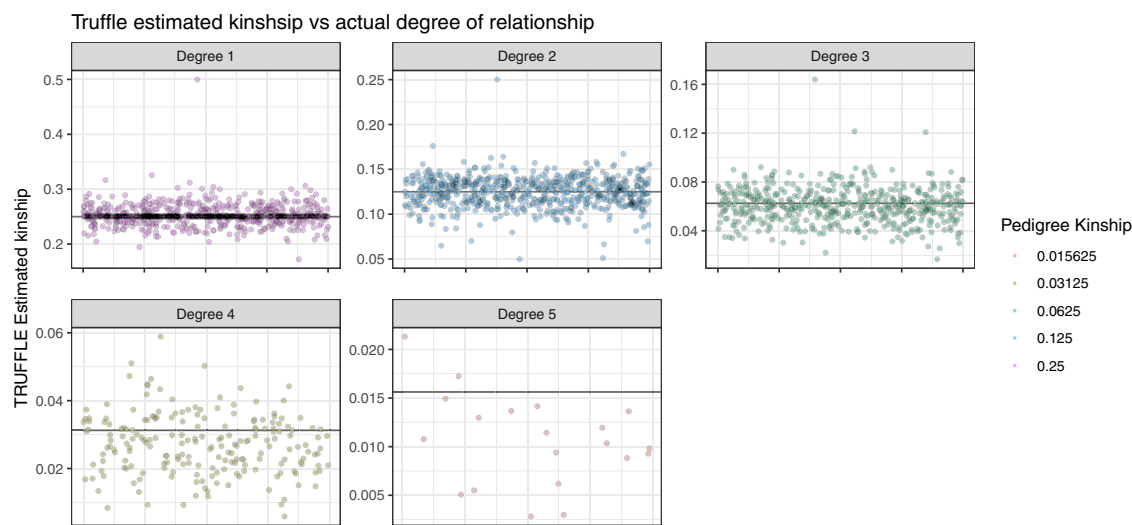

**Figure 7. Kinship Estimation in the GAW20 Data**

Only relative pairs, as specified in the study pedigree, are shown. Results are grouped by the degree of relationship based on the given pedigree structure, and the horizontal line shows the expected kinship coefficient for each panel. With each group, pairs are randomly ordered on the x axis.

having MAF > 5% and minimum distance of 5 kb between two consecutive markers. The TRUFFLE analysis of 337,431 pairs required 32 s on a Core-i7 desktop computer (including both across and within pedigree pairs).

Overall, the TRUFFLE kinship estimates closely matched the reported relationships (Figure 7), even using this non-LD pruned variant subset. Overall, 99.6% of the relationships were estimated correctly to within one degree, where the estimated degree of relationship is computed from the estimated kinship,  $\hat{k}$ , as the closest integer to  $-\log_2 \hat{k} - 1$  (Table S1).

Even though the estimated relationship was in line with the specified one overall, 11 pairs of 4<sup>th</sup> degree or closer related individuals appeared to have mis-specified relationship, with a ratio of reported versus estimated kinship greater than 2 (or  $1/2$ ). In addition, 13 pairs showed strong evidence of inbreeding, having estimated  $p.IBD2 > 2\%$ . Among the 684 presumed unrelated within-pedigree pairs, the average estimated kinship was 0.0013. However, among the 334,431 between-pedigree presumably unrelated pairs, 30 showed estimated relationship of 5<sup>th</sup> degree or closer. These individuals share 4.3% to 11.7% of their genome as IBD1, with shared segments occurring in multiple locations across their genomes and an average of 6.2 shared segments per pair; they are likely to be true relatives.

For comparison, we also applied KING to the GOLDN data. For first- and second-degree relatives, the TRUFFLE and KING kinship estimates are consistent with each other, and with the pedigree-based values. For more distantly related relatives, while TRUFFLE slightly underestimates the relationship, KING slightly overestimates (Table S2).

## Discussion

In applications to population-based data<sup>13</sup> and family-based pedigree data,<sup>23</sup> TRUFFLE provides accurate IBD1

and IBD2 estimation within a few minutes of computer time for a complete scan of all pairs in a sample using un-phased genome-wide data. Although it is likely that HMM-based models, such as Refined IBD,<sup>7</sup> will ultimately have more power in detecting short (1–3 Mb) segments, their computational burden and requirement for phased data prohibits their widespread use.

Our power and pedigree studies showed that TRUFFLE has high accuracy in providing pedigree relationship estimation and distinguishing distant cousin pairs sharing >5 Mb segments (corresponding to a putative 10<sup>th</sup> degree relative pair). Our applications also demonstrated TRUFFLE's applicability to both sequencing and array-based studies. The visualization of the exact locations of detected IBD segments is another useful feature of TRUFFLE. Compared to other commonly used methods, TRUFFLE appears to suffer less from breaking up segments (Figure 6).

Although it is easy to apply TRUFFLE to studies with up to 20,000 individuals, further enhancements and speed improvements would be needed to make application to large-scale, population-based genetic studies routine. When analyzing >20k individuals with >500k variants, there could be memory issues with the current TRUFFLE implementation. Based on the empirical evidence from analyzing dataset (A) (~50k variants) and dataset (B) (~500k variants) in the 1000 Genomes Project, we also recommend reducing the number of variants used as an initial screening step, or analyzing each chromosome separately as practical mitigating solutions. Hashing and dictionary-based approaches are useful future directions by means of avoiding the all-pairs quadratic number of comparisons. Although such methods have been previously applied to segment detection in phased data,<sup>6</sup> application of such methods to un-phased data is not trivial and would require new algorithmic techniques and inferential methods.

Common variants are more informative for IBD inference than rare variants. Genotype accuracy declines with lower MAF, particularly for variants derived from low-coverage NGS.<sup>22</sup> Future work will focus on rare variants, including having error models that differ by MAF and depth.

The relatedness from the X chromosome can be wildly different from the autosomes, as it follows a different inheritance pattern. Because of the lower recombination rate,<sup>25</sup> the X chromosome will require different models for the analysis and discovery of shared segments. The pseudo-autosomal regions of the X chromosome (PAR1-3) would also require specific handling, which is of future research interest.

Overall, TRUFFLE provides a significant improvement in the applicability of IBD segment detection methods to many types of genetic studies. The combination of ease of use, accurate IBD estimation for both distant and close relationships, and segment location visualization greatly extend the goal of traditional relationship inference methods. TRUFFLE can enable disease mapping and population genetics through implicit shared haplotypes by accurate IBD segment detection focusing on overlapping segments from multiple pairs of affected individuals.

### Supplemental Data

Supplemental Data can be found online at <https://doi.org/10.1016/j.ajhg.2019.05.007>.

### Acknowledgments

We sincerely thank the two reviewers, the Associate Editor, and the Editor for constructive comments that substantially improved the manuscript. We also thank the investigators of the GOLDN project and the Genetic Analysis Workshop advisory committee for permission to use GAW20 data. This research was funded by the Canadian Institutes of Health Research (CIHR, MOP-310732-G-CEAA-117978) and the Natural Sciences and Engineering Research Council of Canada (NSERC, RGPIN-250053) to L.S.

### Declaration of Interests

The authors have no conflicts of interest to declare.

Received: October 30, 2018

Accepted: May 10, 2019

Published: June 6, 2019

### Web Resources

1000 Genomes array data, <http://www.tcag.ca/tools/1000genomes.html>

1000 Genomes VCF, <http://ftp.1000genomes.ebi.ac.uk/vol1/ftp/release/20130502/>

BEAGLE Refined IBD Results, [http://ftp.1000genomes.ebi.ac.uk/vol1/ftp/release/20130502/supporting/ibd\\_by\\_pair/](http://ftp.1000genomes.ebi.ac.uk/vol1/ftp/release/20130502/supporting/ibd_by_pair/)

BEAGLE Refined IBD version released on February 26, 2019, <http://faculty.washington.edu/browning/refined-ibd.html>

GERMLINE v.1.5.3 released on 06/10/2018, <http://gusevlab.org/projects/germline/>

Human Genetic Maps GRCh37, [http://bochet.gcc.biostat.washington.edu/beagle/genetic\\_maps/](http://bochet.gcc.biostat.washington.edu/beagle/genetic_maps/)  
KING v.2.1.6, <http://people.virginia.edu/~wc9c/KING/>  
PLINK v.1.90b3.44, <https://www.cog-genomics.org/plink2>  
TRUFFLE v.1.38, <https://adimitromanolakis.github.io/truffle-website/>

### References

1. Sun, L., and Dimitromanolakis, A. (2014). PREST-plus identifies pedigree errors and cryptic relatedness in the GAW18 sample using genome-wide SNP data. *BMC Proc.* 8 (Suppl 1 Genetic Analysis Workshop 18Vanessa Olmo), S23.
2. McPeck, M.S., and Sun, L. (2000). Statistical tests for detection of misspecified relationships by use of genome-screen data. *Am. J. Hum. Genet.* 66, 1076–1094.
3. Purcell, S., Neale, B., Todd-Brown, K., Thomas, L., Ferreira, M.A., Bender, D., Maller, J., Sklar, P., de Bakker, P.I., Daly, M.J., and Sham, P.C. (2007). PLINK: a tool set for whole-genome association and population-based linkage analyses. *Am. J. Hum. Genet.* 81, 559–575.
4. Manichaikul, A., Mychaleckyj, J.C., Rich, S.S., Daly, K., Sale, M., and Chen, W.M. (2010). Robust relationship inference in genome-wide association studies. *Bioinformatics* 26, 2867–2873.
5. Ramstetter, M.D., Dyer, T.D., Lehman, D.M., Curran, J.E., Duggirala, R., Blangero, J., Mezey, J.G., and Williams, A.L. (2017). Benchmarking Relatedness Inference Methods with Genome-Wide Data from Thousands of Relatives. *Genetics* 207, 75–82.
6. Gusev, A., Lowe, J.K., Stoffel, M., Daly, M.J., Altshuler, D., Breslow, J.L., Friedman, J.M., and Pe'er, I. (2009). Whole population, genome-wide mapping of hidden relatedness. *Genome Res.* 19, 318–326.
7. Browning, B.L., and Browning, S.R. (2013). Improving the accuracy and efficiency of identity-by-descent detection in population data. *Genetics* 194, 459–471.
8. Browning, B.L., and Browning, S.R. (2011). A fast, powerful method for detecting identity by descent. *Am. J. Hum. Genet.* 88, 173–182.
9. Browning, S.R., and Browning, B.L. (2010). High-resolution detection of identity by descent in unrelated individuals. *Am. J. Hum. Genet.* 86, 526–539.
10. Browning, B.L., and Browning, S.R. (2013). Detecting identity by descent and estimating genotype error rates in sequence data. *Am. J. Hum. Genet.* 93, 840–851.
11. Rodriguez, J.M., Bercovici, S., Huang, L., Frostig, R., and Batzoglu, S. (2015). Parent2: a fast and accurate method for detecting identity by descent. *Genome Res.* 25, 280–289.
12. Chen, W.M., Manichaikul, A., Nguyen, J., Onengut-Gumuscu, S., and Rich, S.S. (2017). Integrated inference that accurately identifies close relatives in > 1 million samples. In Annual Meeting of the American Society of Human Genetics 2017.
13. Auton, A., Brooks, L.D., Durbin, R.M., Garrison, E.P., Kang, H.M., Korbel, J.O., Marchini, J.L., McCarthy, S., McVean, G.A., Abecasis, G.R.; and 1000 Genomes Project Consortium (2015). A global reference for human genetic variation. *Nature* 526, 68–74.
14. Danecek, P., Auton, A., Abecasis, G., Albers, C.A., Banks, E., DePristo, M.A., Handsaker, R.E., Lunter, G., Marth, G.T., Sherry, S.T., et al.; 1000 Genomes Project Analysis Group (2011). The variant call format and VCFtools. *Bioinformatics* 27, 2156–2158.

15. Peng, B., and Kimmel, M. (2005). simuPOP: a forward-time population genetics simulation environment. *Bioinformatics* 21, 3686–3687.
16. Peng, B., and Amos, C.I. (2010). Forward-time simulation of realistic samples for genome-wide association studies. *BMC Bioinformatics* 11, 442.
17. Frazer, K.A., Ballinger, D.G., Cox, D.R., Hinds, D.A., Stuve, L.L., Gibbs, R.A., Belmont, J.W., Boudreau, A., Hardenbol, P., Leal, S.M., et al.; International HapMap Consortium (2007). A second generation human haplotype map of over 3.1 million SNPs. *Nature* 449, 851–861.
18. Gusev, A., Palamara, P.F., Aponte, G., Zhuang, Z., Darvasi, A., Gregersen, P., and Pe'er, I. (2012). The architecture of long-range haplotypes shared within and across populations. *Mol. Biol. Evol.* 29, 473–486.
19. Li, H., Glusman, G., Hu, H., Shankaracharya, Caballero, J., Hubley, R., Witherspoon, D., Guthery, S.L., Mauldin, D.E., Jorde, L.B., et al. (2014). Relationship estimation from whole-genome sequence data. *PLoS Genet.* 10, e1004144.
20. Campbell, M.C., and Tishkoff, S.A. (2008). African genetic diversity: implications for human demographic history, modern human origins, and complex disease mapping. *Annu. Rev. Genomics Hum. Genet.* 9, 403–433.
21. Roslin, N., Li, W., Paterson, A.D., and Strug, L. (2016). Quality control analysis of the 1000 Genomes Project Omni2.5 genotypes. *bioRxiv*. <https://doi.org/10.1101/078600>.
22. Abecasis, G.R., Altshuler, D., Auton, A., Brooks, L.D., Durbin, R.M., Gibbs, R.A., Hurles, M.E., McVean, G.A.; and 1000 Genomes Project Consortium (2010). A map of human genome variation from population-scale sequencing. *Nature* 467, 1061–1073.
23. Aslibekyan, S., Goodarzi, M.O., Frazier-Wood, A.C., Yan, X., Irvin, M.R., Kim, E., Tiwari, H.K., Guo, X., Straka, R.J., Taylor, K.D., et al. (2012). Variants identified in a GWAS meta-analysis for blood lipids are associated with the lipid response to fenofibrate. *PLoS ONE* 7, e48663.
24. Higgins, M., Province, M., Heiss, G., Eckfeldt, J., Ellison, R.C., Folsom, A.R., Rao, D.C., Sprafka, J.M., and Williams, R. (1996). NHLBI Family Heart Study: objectives and design. *Am. J. Epidemiol.* 143, 1219–1228.
25. Sachidanandam, R., Weissman, D., Schmidt, S.C., Kakol, J.M., Stein, L.D., Marth, G., Sherry, S., Mullikin, J.C., Mortimore, B.J., Willey, D.L., et al.; International SNP Map Working Group (2001). A map of human genome sequence variation containing 1.42 million single nucleotide polymorphisms. *Nature* 409, 928–933.

**The American Journal of Human Genetics, Volume 105**

**Supplemental Data**

**Fast and Accurate Shared Segment Detection  
and Relatedness Estimation  
in Un-phased Genetic Data via TRUFFLE**

**Apostolos Dimitromanolakis, Andrew D. Paterson, and Lei Sun**

## Supplementary data

### Fast and accurate shared segment detection and relatedness estimation in un-phased genetic data using TRUFFLE Apostolos Dimitromanolakis, Andrew D. Paterson, Lei Sun

#### **1. Description of downloaded data from 1000 genomes**

The 1000 genomes dataset 20130502 was downloaded as 22 VCF files for the 22 autosomal chromosomes, from the following url:

<ftp://ftp.1000genomes.ebi.ac.uk/vol1/ftp/release/20130502/>.

Filtering and LD-pruning of variants for the generation of dataset A was performed using PLINK (version 1.90b44).

The resulting vcf files are available for download at the github URL:

<https://github.com/adimitromanolakis/truffle>

#### **2. Average allele sharing in 1000 genomes dataset**

Compute average probability of sharing 1,2 or 2 alleles is important in establishing a baseline minimum region size for called segments. For dataset B with 469k autosomal markers, we compute the probability of sharing 1 or 2 alleles ( $1-p_{\text{IBS0}}$ ) in windows of 1000 markers across the genome (figure S1), which ranged from 0.916 to 0.937 ( mean 0.926 ). For  $p_{\text{IBS2}}$ , the mean value across the genome for 1000 marker windows ranged from 0.459 to 0.511 (mean 0.483).

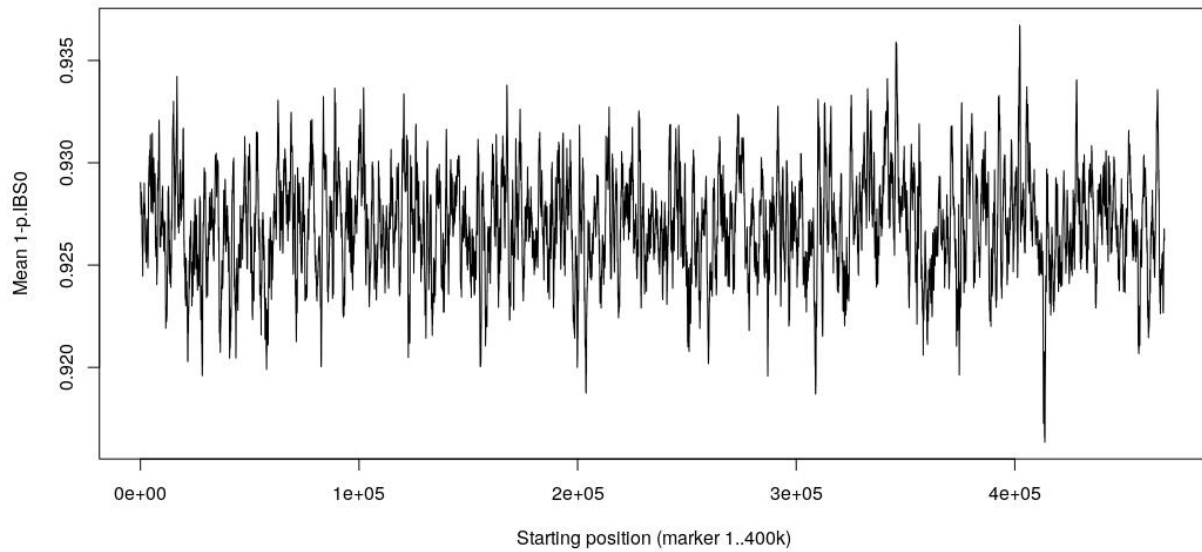

**Figure S1:** Probability of sharing 1 or 2 alleles (averaged over all pairs of individuals) at every genomic location. 1000 Genomes data – Dataset B

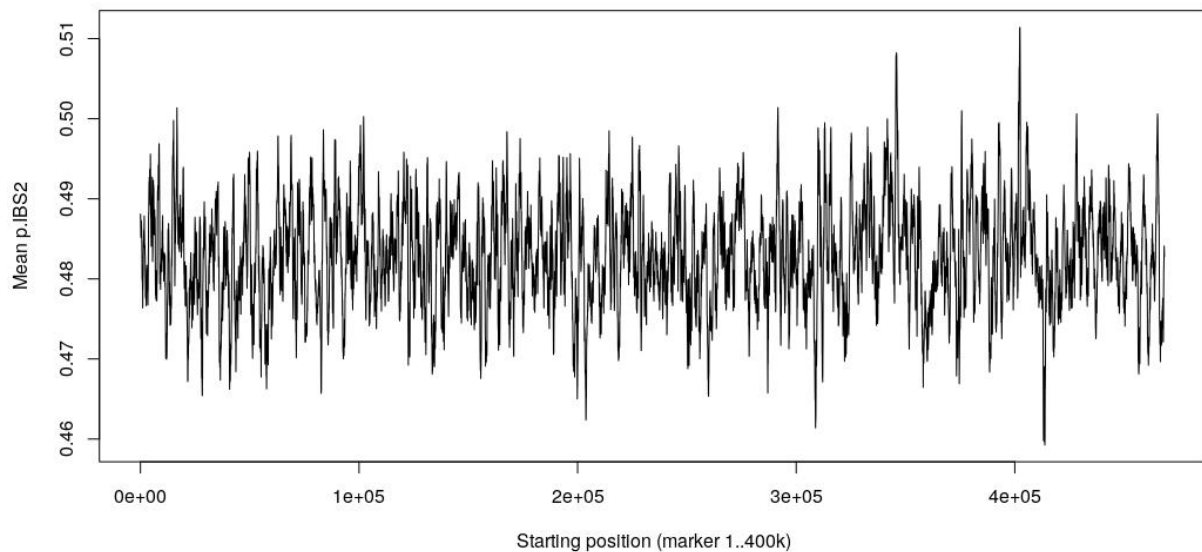

**Figure S2:** Probability of sharing 2 alleles (averaged over all pairs of individuals) at every genomic location. 1000 Genomes data – Dataset B

### 3. Sensitivity analysis of the segment length cutoff parameter

We analyzed the sensitivity of the IBD1 and IBD2 estimates, by varying the estimation window parameter  $S$  from 0.1 to 4, and analyzing all pairwise relationships for 47 individuals from dataset B. These 47 individuals included individuals previously identified by TRUFFLE as parent-offspring, full-sibling. In addition we included individuals being identified as unrelated (as pairs with very low identified IBD). The variant set analyzed was dataset B.

Internally, truffle computes a minimum accepted segment length of an IBS1 or 2 segment for its inclusion as IBD. The parameter  $S$  in TRUFFLE specifies the adjustment factor of this length. For example a value of 2, will specify that only segments twice as long as the default value will be accepted. The trajectories of IBD1 and IBD2 estimates of those pairs (figure S3), show how the corresponding relatedness estimation varies by adjusting  $S$ . Increasing values of  $S$  reduce the estimates of IBD1 and IBD2 as smaller segments are not counted. Decreasing values of  $S$  have the opposite effect, by included very small IBS1 and IBS2, which occur likely by chance or because of the LD between the markers.

For a small number of pairs, the trajectories of 2 specific pairs (selected as 1 parent-offspring, 1 full sibling) are compared to the model without the provision for genotyping error (figure S4).

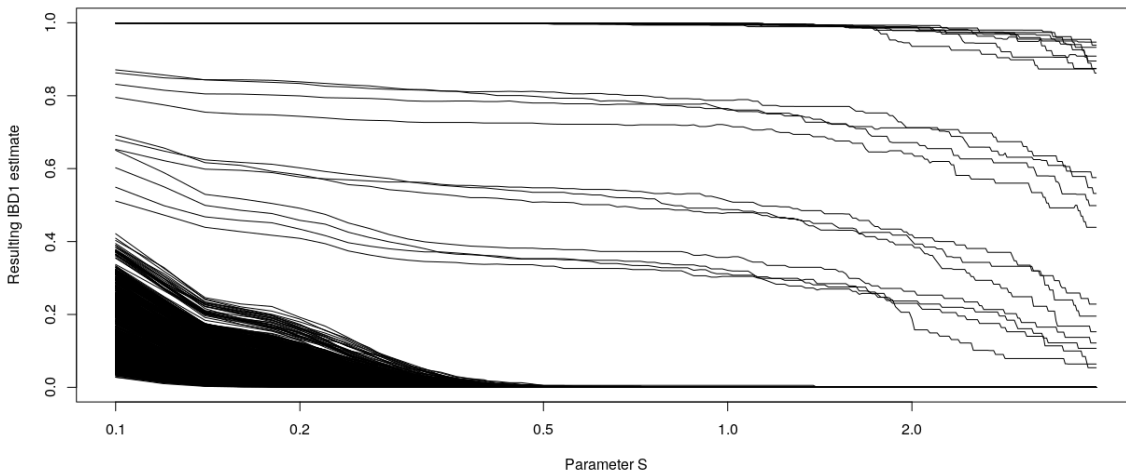

(a)

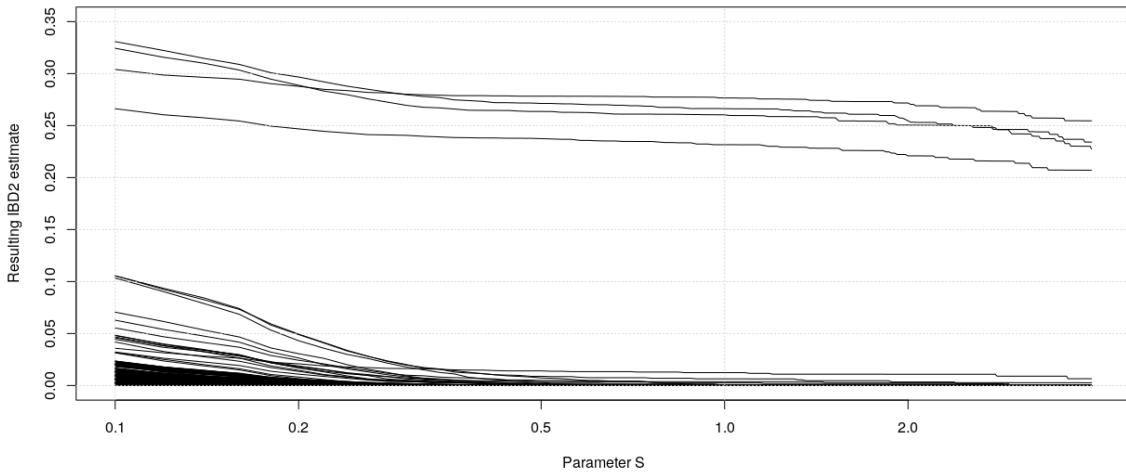

(b)

**Figure S3:** Trajectories of IBD1 and IBD2 estimates for 1081 pairs from the 1000 genomes data, by varying the parameter L in truffle. The pairs included the 12 identified 1<sup>st</sup> degree relative pairs, 7 additional pairs of 2<sup>nd</sup> to 3<sup>rd</sup> degree relatedness and a number of randomly selected pairs with low detected IBD. Each line represents one pair of individuals and the estimation of IBD1 or 2 for all values of the parameter S. (a) IBD1 estimation vs L. (b) IBD2 estimation vs L.



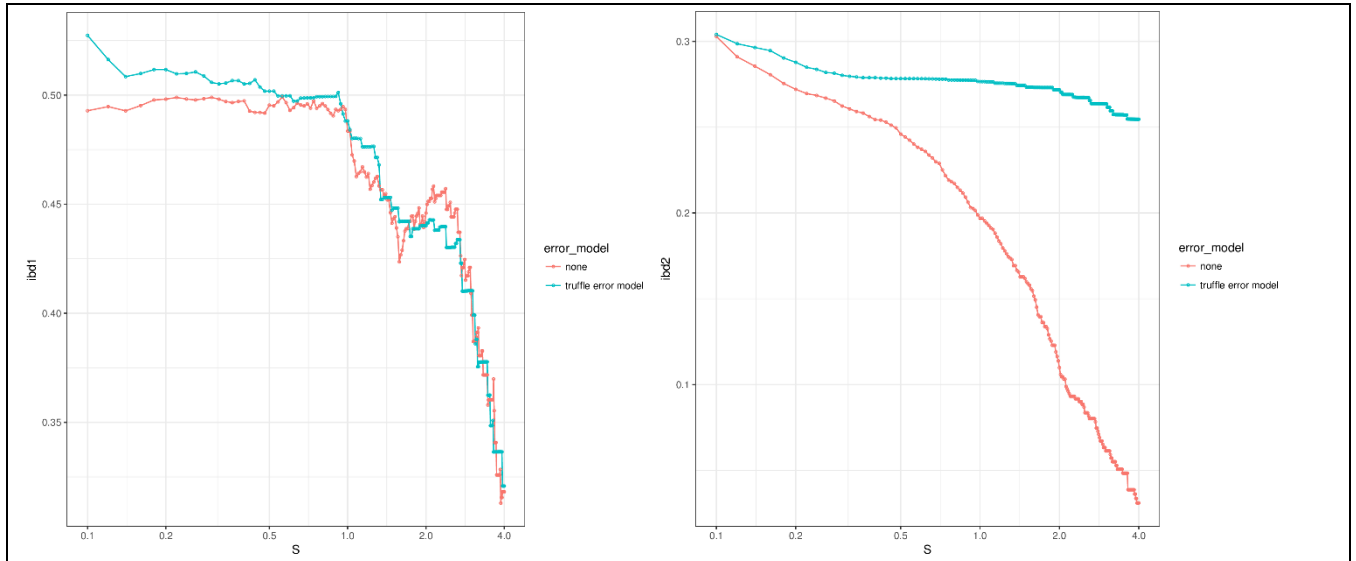

(a) Full Sibling Pair:

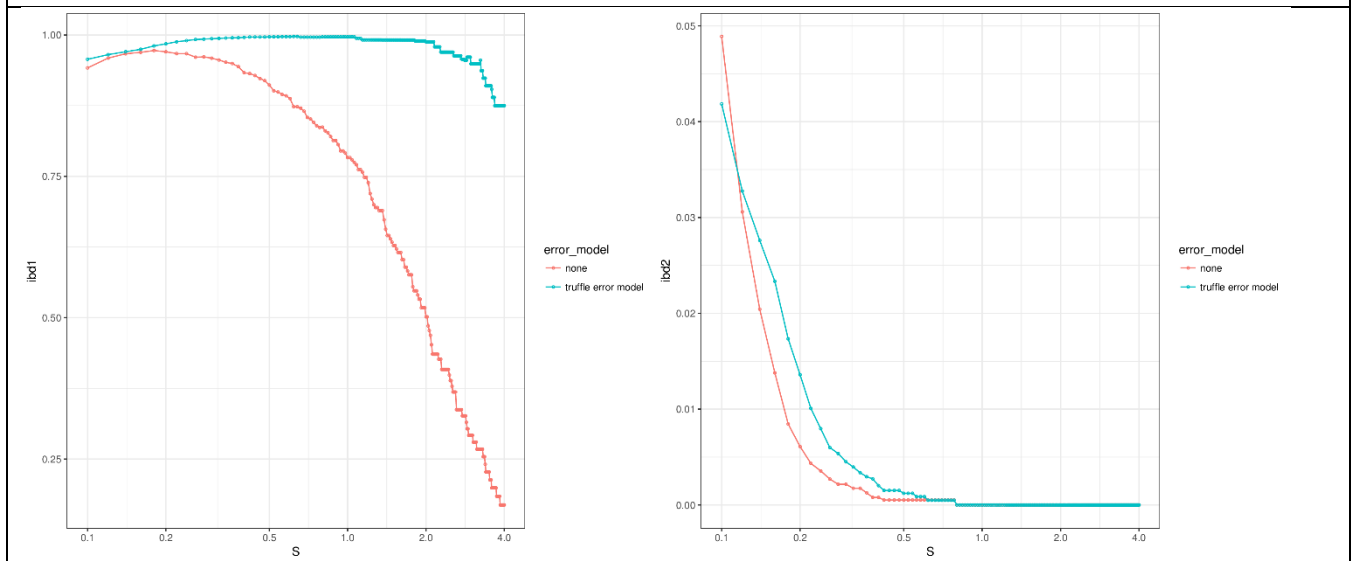

(b) Parent offspring pair

**Figure S4:** Estimated IBD2 and IBD1 probabilities (y-axis) vs. segment length cutoff (x-axis, truffle parameter  $-S$ ). Model without the inclusion of genotyping error is shown in red, default truffle model is shown in blue. X axis is on log scale.

#### 4. Kinship estimation in the 1000 genomes dataset

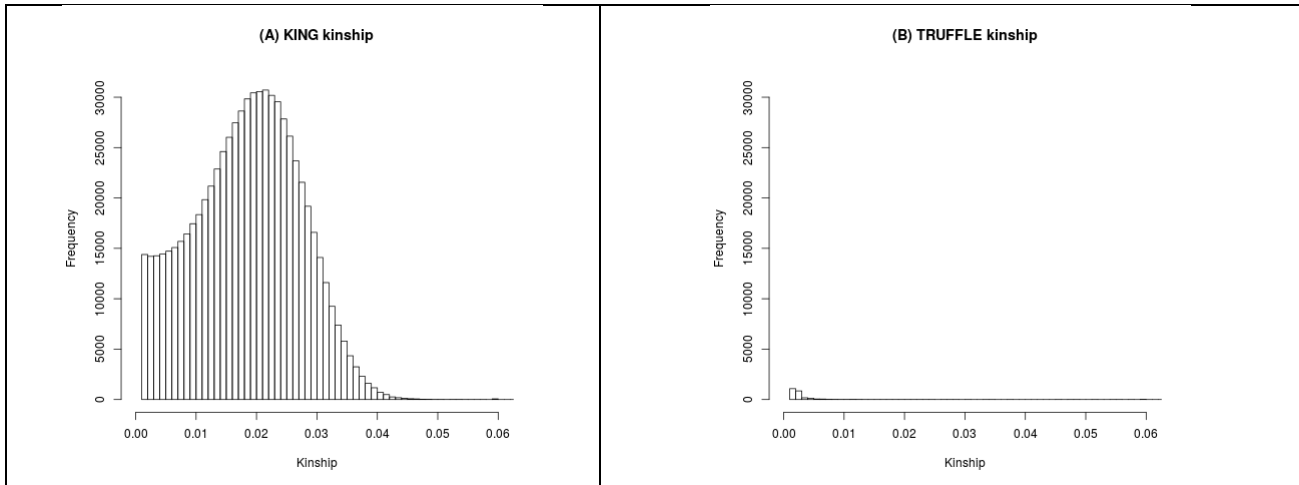

**Figure S5:** Estimation of kinship for 3.1 million pairs in dataset A, shown a histogram of estimated kinships across all pairs. A: KING kinship method shows inflation in kinship estimates below a kinship value of 0.05 (573326 pairs estimated to be second cousin or closer). Dataset A, 65k markers. For clarity pairs with kinship < 0.001 are not shown (2429061 pairs excluded in panel A and 3131206 pairs in panel B). Relationships with kinship >0.06 are also not shown.

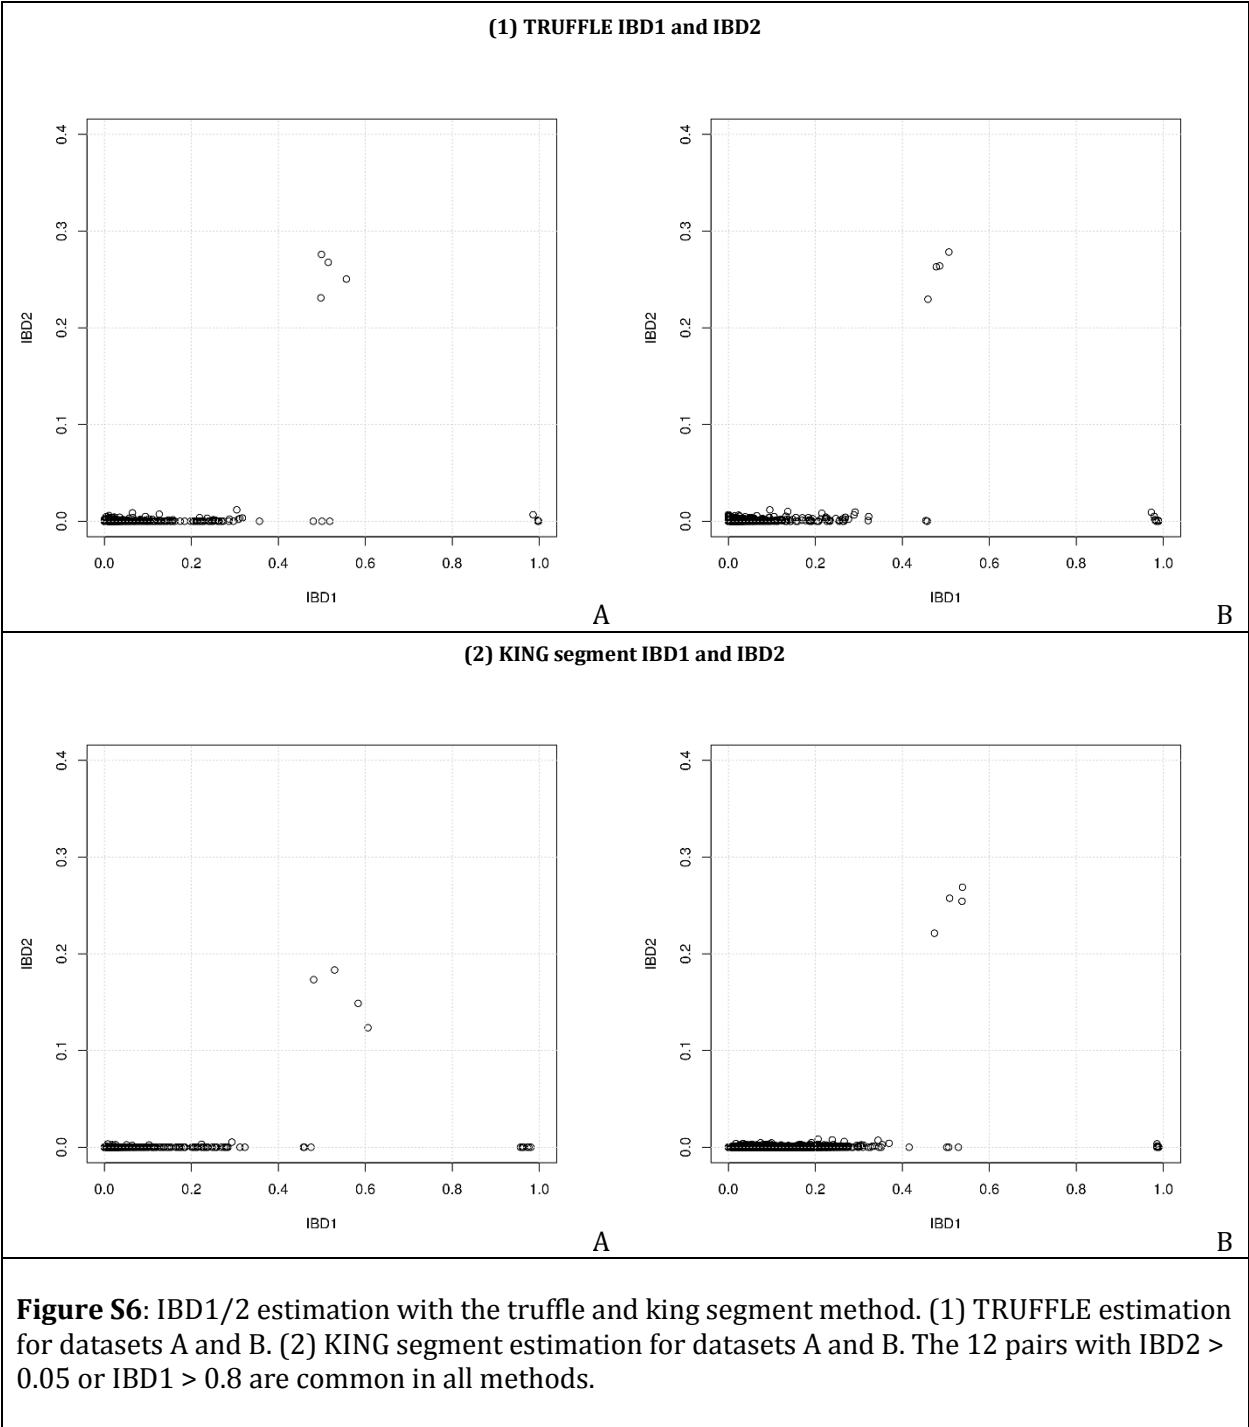

## 5. Shared segment analysis by BEAGLE

We downloaded a list of shared segments greater than 5cM among the 2504 individuals in the 1000 genomes dataset, as reported in (Auton, et al., 2015) (Supplementary data section).

These segment lists have been manually curated to join nearby short segments, due to that Refined IBD has no error model and is prone to reporting long segments as multiple short ones.

The data were downloaded from:

[ftp://ftp.1000genomes.ebi.ac.uk/vol1/ftp/release/20130502/supporting/ibd\\_by\\_pair/](ftp://ftp.1000genomes.ebi.ac.uk/vol1/ftp/release/20130502/supporting/ibd_by_pair/)

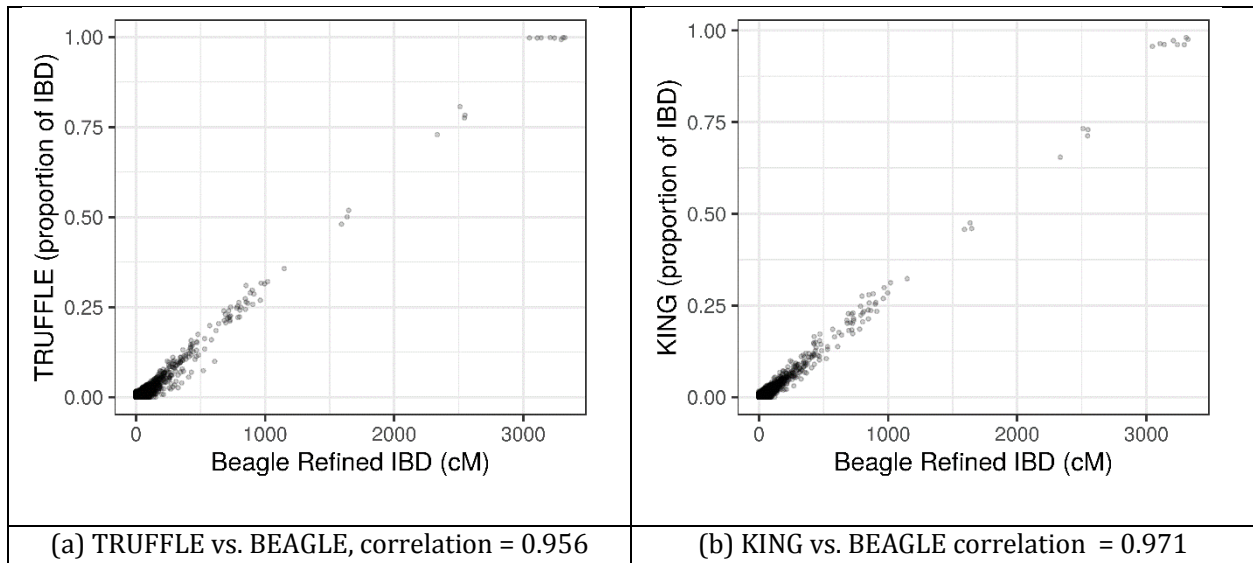

**Figure S7:** Comparison of shared segment length identified by (a) TRUFFLE vs. BEAGLE, and (b) KING vs. BEAGLE using the dataset (A) (1000 Genomes data; approx.. 65k markers).

## 6. Kinship estimation comparison between array and sequencing+array data

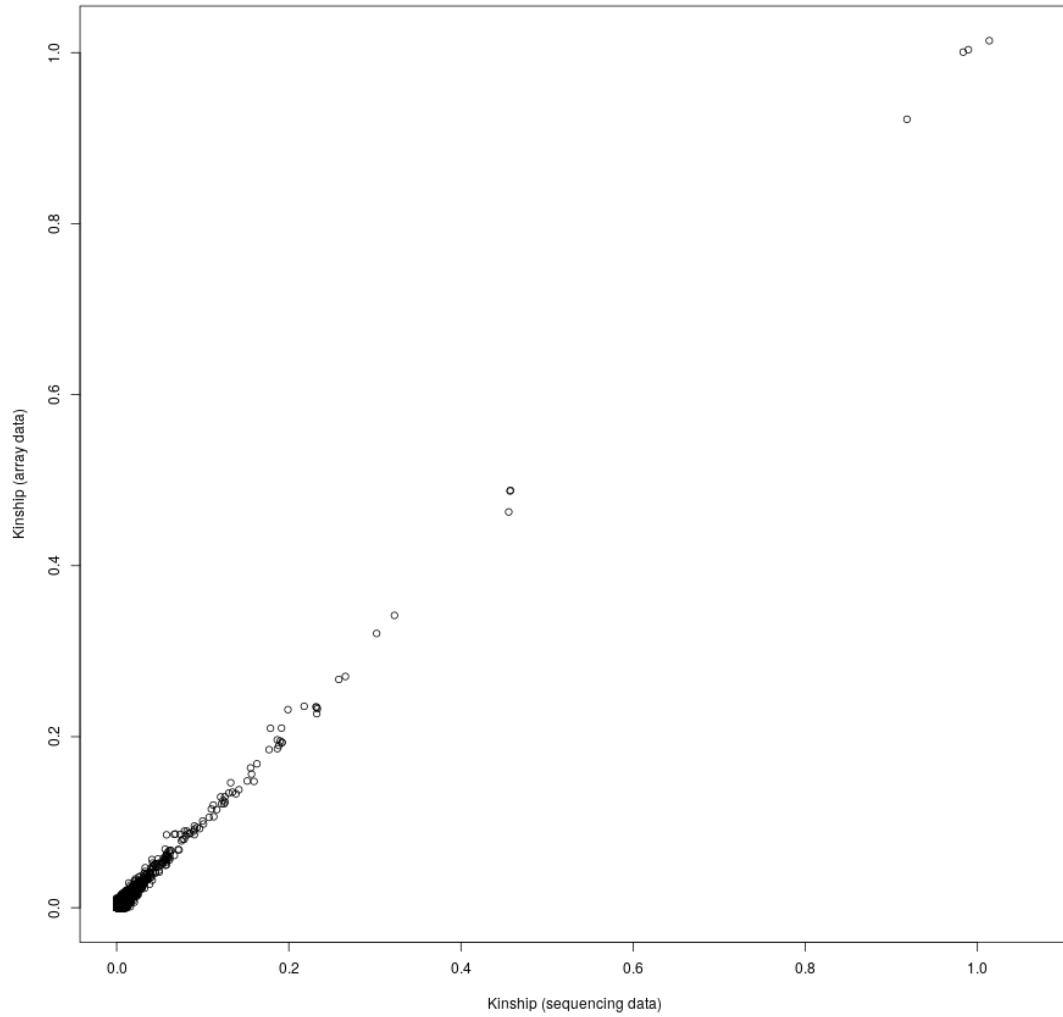

**Figure S8:** Kinship estimation by truffle in 1000 genomes array vs. consensus call data (dataset B). X-axis: sequencing data. Y-axis: array data. Correlation coefficient  $r = 0.93$ .

## 7. Identity by Descent analysis within populations

| Population | % of pairs sharing an IBD1 segment of length >5cM | % of pairs sharing an IBD1 segment of length >10cM | % of pairs sharing an IBD2 segment of length >5cM | Number of pairs |
|------------|---------------------------------------------------|----------------------------------------------------|---------------------------------------------------|-----------------|
| ACB        | 9.17                                              | 5.60                                               | 0.000                                             | 4517            |
| ASW        | 2.21                                              | 0.89                                               | 0.000                                             | 1807            |
| BEB        | 5.86                                              | 0.55                                               | 0.000                                             | 3649            |
| CDX        | 43.26                                             | 7.54                                               | 0.000                                             | 4191            |
| CEU        | 12.35                                             | 0.70                                               | 0.000                                             | 4834            |
| CHB        | 14.87                                             | 0.21                                               | 0.000                                             | 5253            |
| CHS        | 19.27                                             | 1.66                                               | 0.000                                             | 5429            |
| CLM        | 61.52                                             | 40.47                                              | 0.077                                             | 3919            |
| ESN        | 26.58                                             | 14.29                                              | 0.000                                             | 4710            |
| FIN        | 74.72                                             | 18.48                                              | 0.021                                             | 4790            |
| GBR        | 19.25                                             | 5.75                                               | 0.025                                             | 4053            |
| GIH        | 35.73                                             | 8.88                                               | 0.000                                             | 5181            |
| GWD        | 9.01                                              | 3.19                                               | 0.016                                             | 6270            |
| IBS        | 10.15                                             | 0.65                                               | 0.000                                             | 5666            |
| ITU        | 11.21                                             | 1.48                                               | 0.000                                             | 5138            |
| JPT        | 30.36                                             | 0.67                                               | 0.000                                             | 5356            |
| KHV        | 24.71                                             | 1.88                                               | 0.000                                             | 4848            |
| LWK        | 40.97                                             | 13.57                                              | 0.000                                             | 4681            |
| MSL        | 24.07                                             | 10.97                                              | 0.000                                             | 3519            |
| MXL        | 38.71                                             | 5.03                                               | 0.000                                             | 2007            |
| PEL        | 78.64                                             | 10.02                                              | 0.000                                             | 3562            |
| PJL        | 14.61                                             | 5.18                                               | 0.022                                             | 4496            |
| PUR        | 82.67                                             | 62.02                                              | 0.289                                             | 4495            |
| STU        | 23.41                                             | 7.90                                               | 0.000                                             | 5079            |
| TSI        | 21.82                                             | 7.58                                               | 0.000                                             | 5623            |
| YRI        | 4.11                                              | 1.51                                               | 0.000                                             | 5773            |

**Figure S9:** For each same population pair we compute the percent of pairs sharing: (1) at least an IBD1 segment of length 5cM, (2) at least an IBD1 segment of length 10cM, (3) at least an IBD2 segment of length 5cM.

## 8. Short segment density plots occurring within populations.

For all the populations in the 1000 genomes dataset, we generate segment density plots that highlight the regions of extended IBD1 segment sharing for every chromosome. The blue rectangles denote gaps in the genome assembly, including centromere regions and other large gaps of more than 1MBp.

**Figure S10:** Distribution and locations of segments shared within population in the 1000 genomes data. Estimated from variant set (B).

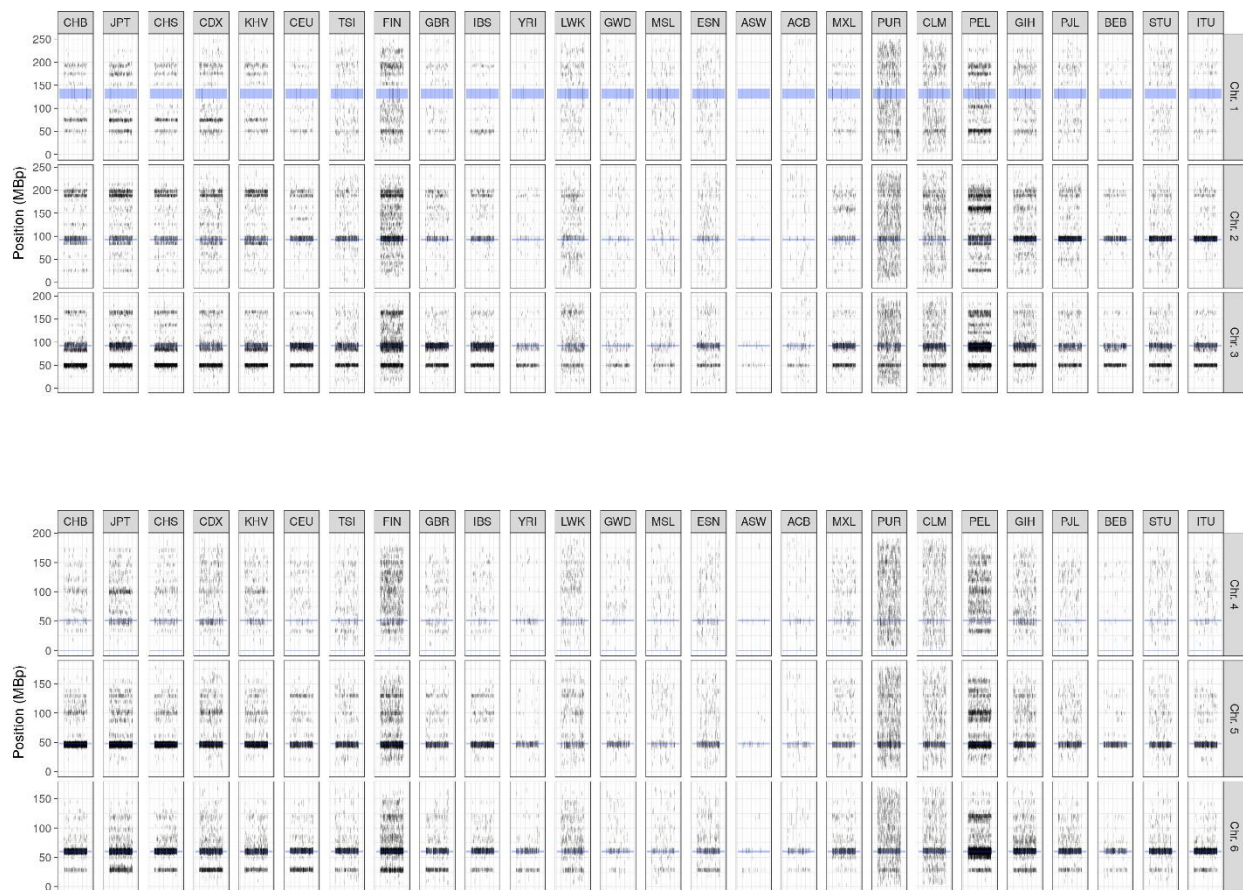

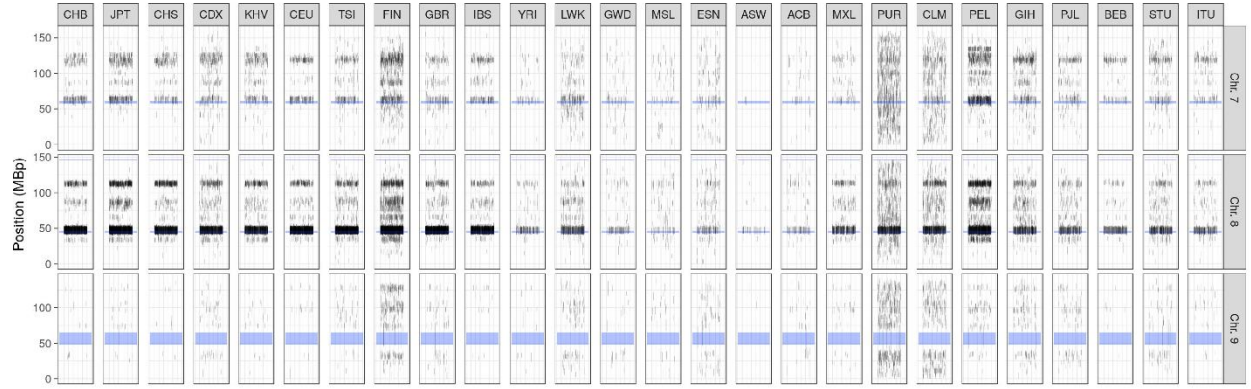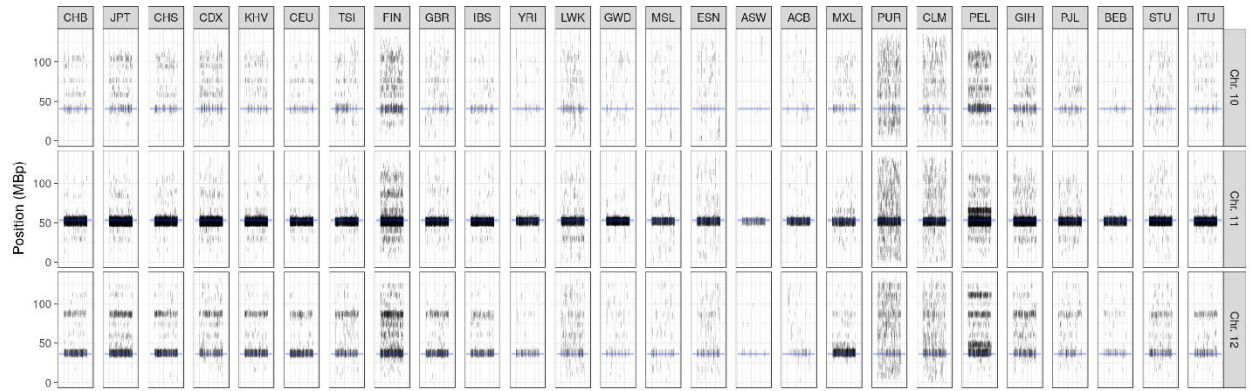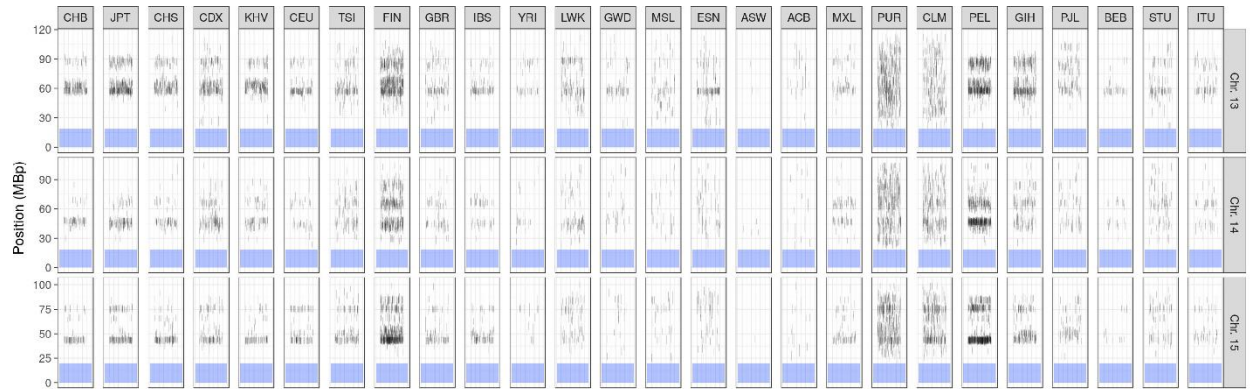



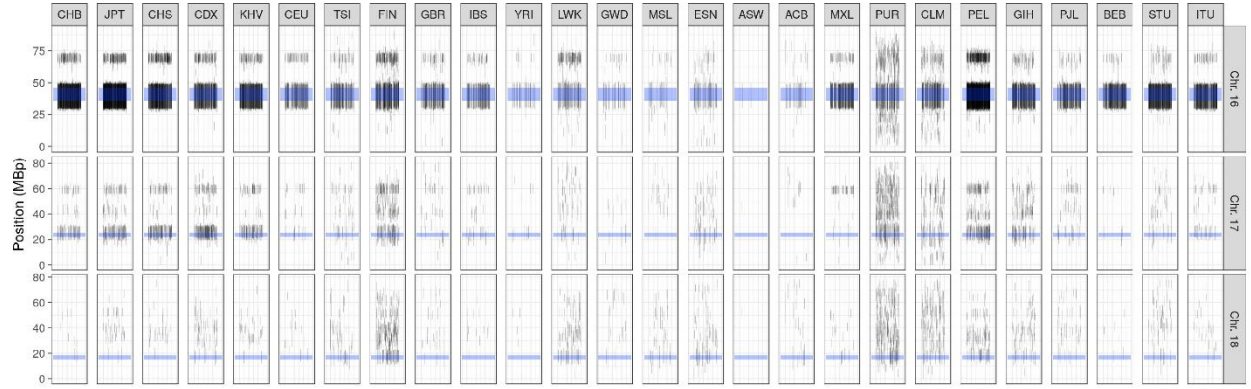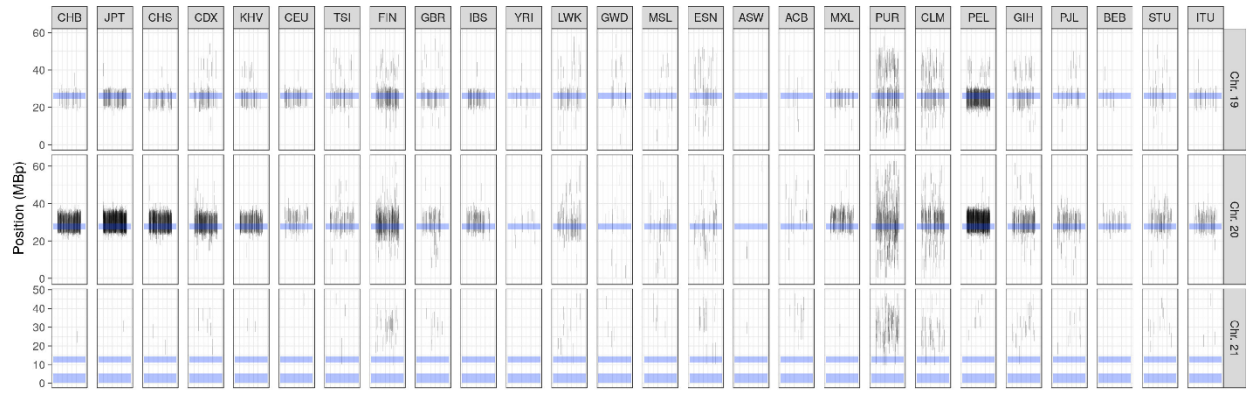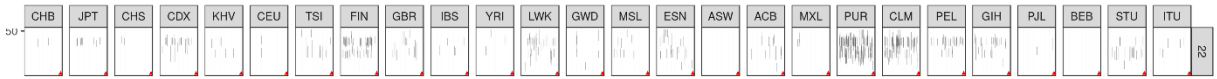

## 9. IBD segments in 1000 genomes between different methods and SNPs

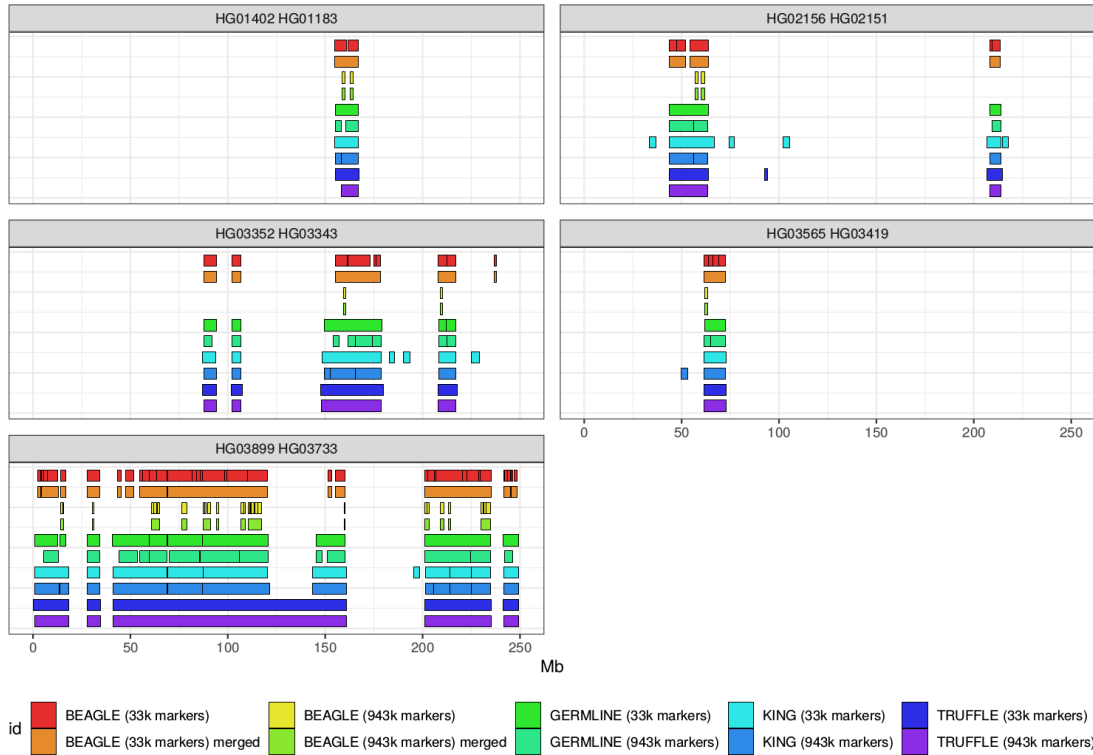

**Supplementary Figure S11. Comparison of locations of IBD segments on chromosome 1 from the 1000 Genomes Project for 5 randomly selected pairs, 1 each from full-sibs and 1st cousins, and 3 more distantly related pairs.** The data are from phase 3 release 5. KING and TRUFFLE can work on unphased data, and BEAGLE Refined IBD and GERMLINE were applied to the data previously phased by the 1000 genomes analysis group using both BEAGLE and Shapeit2. The 33k SNPs have MAF >5% with > 5 kb between two consecutive SNPs with missing rate <2%, and the 943k SNPs have MAF >1% and missing rate <2%. Positions are based on build 37, where the centromere is located at 121.5 - 142.5 Mb.

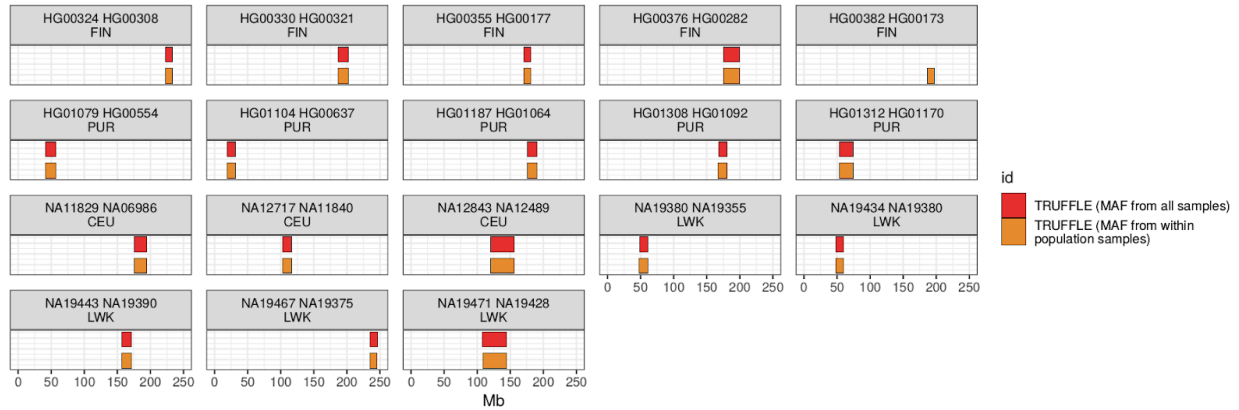

**Supplementary Figure S12. Comparison between segment locations inferred when using global MAF cutoff criteria vs population-specific MAF from Dataset B using TRUFFLE.** Specifically we run TRUFFLE on the CEU, LWK, FIN, and PUR populations of the 1000 Genomes Project, estimating allele frequencies from either the whole 26 populations or within each population analyzed, using (i) the primary dataset B using cross-population MAF >5% and spacing at least 5 kb, and (ii) the comparison dataset B using within-population MAF >5% and spacing at least 5 kb. Presented are 18 randomly selected within-population pairs on chromosome 1 from CEU, LWK, FIN and PUR 1000 Genomes Project populations.

## 10. Kinship estimation in the GAW20 data

|                               |   | Inferred Degree of Relationship |     |     |     |    |   |      |
|-------------------------------|---|---------------------------------|-----|-----|-----|----|---|------|
|                               |   | 1                               | 2   | 3   | 4   | 5  | 6 | >= 7 |
| Actual Degree of Relationship | 1 | 882                             | 0   | 0   | 0   | 0  | 0 | 0    |
|                               | 2 | 1                               | 678 | 10  | 0   | 0  | 0 | 0    |
|                               | 3 | 0                               | 8   | 464 | 50  | 1  | 0 | 0    |
|                               | 4 | 0                               | 0   | 5   | 144 | 48 | 4 | 1    |
|                               | 5 | 0                               | 0   | 0   | 1   | 7  | 9 | 3    |

**Table S1:** Actual vs. estimated degree of relationship in the GAW20 dataset. Pairs with pedigree relationship specified as non-zero as shown. The estimated degree of relationship is computed from the kinship  $k$  as the closest integer to  $-\log_2 k - 1$ .

**Table S2:** Summary of GOLDN analyses by TRUFFLE and KING.

| Degree | Pedigree-based Kinship Coeff. | TRUFFLE estimates | TRUFFLE Std.Dev. | KING-segment 2.1.6 estimates | KING Std.Dev. |
|--------|-------------------------------|-------------------|------------------|------------------------------|---------------|
| 1      | 0.25                          | 0.252             | 0.0174           | 0.251                        | 0.0171        |
| 2      | 0.125                         | 0.125             | 0.0165           | 0.129                        | 0.0155        |
| 3      | 0.0625                        | 0.0606            | 0.0144           | 0.069                        | 0.0136        |
| 4      | 0.03125                       | 0.0272            | 0.00880          | 0.0369                       | 0.00872       |
| 5      | 0.015625                      | 0.0106            | 0.00470          | 0.021                        | 0.00492       |
| >5     | 0                             | 0.000107          | 0.00037          | 0.00023                      | 0.00155       |

## 11. Simulation scripts used for the power study

The following script was used as a basis for generating an initial population used in the power study. It was adapted from example4 in the simuGWAS collection of population simulation scripts (<https://github.com/BoPeng/simuPOP-examples/tree/master/published/simuGWAS>).

```
#!/usr/bin/env python

#
import sys, os, logging

from simuOpt import Params, setOptions
#setOptions(alleleType='binary', optimized=False, gui=False)

from simuPOP import *

import loadHapMap3, selectMarkers, simuGWAS

def downloadData(logger):
    """
    Download and create populations from the third phase of the HapMap3 data.
    This equivalent to command

    > loadHapMap3.py --chroms=2
    """
    if not os.path.isdir('HapMap'):
        os.mkdir('HapMap')
    for chrom in chroms:
        for popName in loadHapMap3.HapMap3_pops:
            filename = 'HapMap/HapMap3_%s_chr%d.pop' % (popName, chrom)
            if not os.path.isfile(filename):
                pop = loadHapMap3.loadHapMapPop(chrom, popName, logger)
                pop.save(filename)

def getInitPop(logger):
    """
    Step 2: Select 2000 markers on a random regions on chromosomes 2, with minor allele frequency 0.05.

    > selectMarkers.py --chroms=2 --numMarkers=2000 --startPos=50000000 --filename=ex4_init.pop --
minAF=0.05
    --minDist=50000 --HapMap_pops=["HapMap3_JPT+CHB', 'HapMap3_CEU']" --mergeSubPops=False
    """
    if os.path.isfile('ex4_init.pop') and os.path.isfile('ex4_init.pop.lst'):
        if logger:
            logger.info('ex4_init.pop already exists. Please remove this file if you would like to
regenerate an initial population.')
        return
    if logger:
        logger.info('Select 5000 markers from chromosomes 2')
    pop = selectMarkers.getHapMapMarkers(
        HapMap_dir='HapMap',
        chroms=[1],
        HapMap_pops=['HapMap3_TSI', 'HapMap3_LWK'],

        startPos=[10000000],
        minAF=0.05,
        minDist=2000,
        numMarkers=[25000],
        mergeSubPops=False,
        logger=logger)
    if logger:
        logger.info('Saving initial population to ex4_init.pop')
    pop.save('ex4_init.pop')
```

```

createFiles(pop, "init")

if logger:
    logger.info('Saving marker information to ex4_init.pop.lst')
    selectMarkers.saveMarkerList(pop, 'ex4_init.pop.lst', logger)

def expandPop(logger):
    # This is equivalent to
    # > simuGWAS.py --initPop=ex3_init.pop --migrRate=0.0001 --scale=5
    #
    # This just to make this result reproducible.
    getRNG().set(seed=1355)
    #
    filename = 'ex4_expanded.pop'
    if os.path.isfile(filename):
        if logger:
            logger.info('%s already exists. Please remove this file if you would like to regenerate an
expanded population.' % filename)
        return
    else:
        if logger:
            logger.info('Simulating an expanded population %s from ex4_init.pop...' % filename)
        pop = loadPopulation('ex4_init.pop')

    pars = Params(simuGWAS.options, initPop=filename, migrRate=0.0001,
                  recIntensity=100e-8,
                  scale=1,
                  expandSize=15000, expandGen=3000)

    pop = simuGWAS.simuGWAS(pars, pop, logger=logger)
    if logger:
        logger.info('Saving expanded population to ' + filename)
        pop.save(filename)

def mix(logger):
    '''Load expanded population and mix using non-random mating'''
    if logger:
        logger.info('Loading population ex4_expanded.pop and mix')
        pop = loadPopulation('ex4_expanded.pop')
        pop.addInfoFields('ancestry')
        # define two virtual subpopulations by ancestry value
        pop.setVirtualSplitter(InfoSplitter(field='ancestry', cutoff = [0.5]))
        # initialize ancestry
        initInfo(pop, [0]*pop.subPopSize(0) + [1]*pop.subPopSize(1), infoFields='ancestry')
        initSex(pop)
        ops=[ MendelianGenoTransmitter(),
              InheritTagger(mode=MEAN, infoFields='ancestry')
            ]
        pop.evolve(
            preOps = Migrator(rate = [
                [0., 0], [0.05, 0]]),
            matingScheme = HeteroMating(
                matingSchemes=[
                    RandomMating(ops=ops),
                    RandomMating(subPops=[(0,0)], weight=-0.80, ops=ops),
                    RandomMating(subPops=[(0,1)], weight=-0.80, ops=ops)
                ],
            ),
            postOps = PyEval(r'''Generation %d\n' % gen'''),
            gen=10,
        )
        # remove the second subpop
    if logger:
        logger.info('Removing MKK subpopulation and save admixed population to ex4_mixed.pop')

```

```
pop.removeSubPops(1)
pop.save('ex4_mixed.pop')
```

```
def createFiles(pop,inputfileroot):
    """Creates inputdata file for PLINK in biallelic format. Assumes inputdata is phased haplotypes,
one line
per individual."""
    if pop.ploidy() != 2:
        print "PLINK requires biallelic data!"
        return 0

    numInd = pop.popSize()
    locNames = pop.lociNames()
    numLoc = pop.totNumLoci()
    allInd = pop.genotype()

    markerfilename = inputfileroot + ".ped"
    markerOut = open(markerfilename,'w')
    id_counter = 0
    for ind in pop.individuals():
        geno = ind.genotype()
        hap1 = ['1' if x == 0 else '2' for x in geno[:numLoc]]
        hap2 = ['1' if x == 0 else '2' for x in geno[numLoc:]]
        geno_out = " ".join(["%s %s"%(hap1[i],hap2[i]) for i in xrange(numLoc)])
        if ind.affected():
            outstring = "case%d 1 0 0 1 2 %s\n"%(id_counter,geno_out)
        else:
            outstring = "control%d 1 0 0 1 1 %s\n"%(id_counter,geno_out)
        id_counter +=1
        markerOut.write(outstring)
    markerOut.close()

    positionfilename = inputfileroot + ".map"
    positionOut = open(positionfilename,'w')
    for loc in xrange(numLoc):
        positionOutString = "%s\t%s\t0\t%s\n"
        %(pop.chromName(pop.chromLocusPair(loc)[0]),locNames[loc],pop.locusPos(loc))
        positionOut.write(positionOutString)
    positionOut.close()
    return [markerfilename,positionfilename]
```

```
if __name__ == '__main__':
    logging.basicConfig(level=logging.DEBUG)
    logger = logging.getLogger('example4')
    # downloadData([2], logger)
    getInitPop(logger)
    expandPop(logger)

    pop = loadPopulation('ex4_expanded.pop')
    createFiles(pop, "g3000")

    #mix(logger)

    #pop = loadPopulation('ex4_mixed.pop')
    #createFiles(pop, 'ex4_mixed')
```

## References

Auton, A., *et al.* (2015) A global reference for human genetic variation, *Nature*, **526**, 68-74.
